# 1 Impact of emerging mutations on the dynamic 2 properties the SARS-CoV-2 main protease: an *in* 3 *silico* investigation

4 Olivier Sheik Amamuddy<sup>1</sup>, Gennady M. Verkhivker<sup>2,3,4</sup> and Özlem Tastan Bishop<sup>1\*</sup>

5 <sup>1</sup> Research Unit in Bioinformatics, Department of Microbiology and Biochemistry, Rhodes University,  
6 Grahamstown, South Africa

7 <sup>2</sup> Graduate Program in Computational and Data Sciences, Schmid College of Science and Technology,  
8 Chapman University, Orange, CA 92866, United States of America

9 <sup>3</sup> Department of Biomedical and Pharmaceutical Sciences, Chapman University School of Pharmacy, Irvine,  
10 CA 92618, United States of America

11 <sup>4</sup> Department of Pharmacology, Skaggs School of Pharmacy and Pharmaceutical Sciences, University of  
12 California San Diego, 9500 Gilman Drive, La Jolla, CA 92093, USA

13 \* Correspondence: \* o.tastanbishop@ru.ac.za (ÖTB)

14 Received: date; Accepted: date; Published: date

15 **Abstract:** The new coronavirus (SARS-CoV-2) is a global threat to world health and its economy.  
16 Its main protease ( $M^{pro}$ ), which functions as a dimer, cleaves viral precursor proteins in the process  
17 of viral maturation. It is a good candidate for drug development owing to its conservation and the  
18 absence of a human homolog. An improved understanding of the protein behaviour can accelerate  
19 the discovery of effective therapies in order to reduce mortality. 100 ns all-atom molecular  
20 dynamics simulations of 50 homology modelled mutant  $M^{pro}$  dimers were performed at pH 7 from  
21 filtered sequences obtained from the GISAID database. Protease dynamics were analysed using  
22 RMSD, RMSF,  $R_g$ , the averaged *betweenness centrality* and geometry calculations. Domains from  
23 each  $M^{pro}$  protomer were found to generally have independent motions, while the dimer-  
24 stabilising N-finger region was found to be flexible in most mutants. A mirrored interprotomer  
25 pocket was found to be correlated to the catalytic site using compaction dynamics, and can be a  
26 potential allosteric target. The high number of titratable amino acids of  $M^{pro}$  may indicate an  
27 important role of pH on enzyme dynamics, as previously reported for SARS-CoV. Independent  
28 coarse-grained Monte Carlo simulations suggest a link between rigidity/mutability and enzymatic  
29 function.

30 **Keywords:** SARS-CoV-2; main protease; molecular dynamics; non-synonymous mutations; MD-  
31 TASK

32

---

## 33 1. Introduction

34 The human severe acute respiratory syndrome coronavirus 2 (SARS-CoV-2) strain is the  
35 causative agent of the COVID-19 pandemic [1]. After being first reported from the Wuhan seafood  
36 and animal market in late December 2019 [2], the total number of reported cases worldwide has  
37 reached over 5.8 million, with an overall crude death rate reported at 3.67% [3]. The disease is  
38 however more severe amongst the elderly, and those living with co-morbidities that involve  
39 endothelial dysfunction [4], such as hypertension, obesity and diabetes [5]. While there is currently  
40 no cure or available vaccine [2,6], there is a lot of uncertainty around the behaviour of the pathogen.  
41 Drastic measures designed to limit the rate of new infections [7] have resulted in global economic  
42 problems, which have affected many livelihoods, even exacerbating food insecurity [8]. Owing to  
43 the rapid generation of genomic sequence data [9,10] and the timely availability of 3D structural  
44 data, research into potential drugs is under way alongside clinical trials. Fundamental research is  
45 key to understanding the pathogen's strategies such that more informed decisions can be made  
46 about clinical interventions. As seen in other pathogens, mutations occur through the normal

47 process of evolution, and certain advantageous variations can be selected for over time. The SARS-  
48 CoV-2 genome is RNA-based, and viruses from this category have been reported to have increased  
49 rates of mutation [11]. For instance, in HIV this has led to several levels of classification of the  
50 virus, in which certain strains can manifest different transmissibility patterns and show differing  
51 responses to existing therapies [12,13]. From the data gathered from the GISAID database [9] and  
52 real-time sub-sample estimates of genetic relatedness from the Nextstrain web resource [14], it is  
53 clear that the virus is evolving within the human host.

54 Although progress is being gradually made in understanding viral structural biology and  
55 symptomatology of the disease, current knowledge is still fragmentary [15,16], while the death toll  
56 and the number of infections keeps on rising. Thus, time is of the essence for the discovery of  
57 effective therapies. It is imperative to better characterise parts of the viral mechanisms to better  
58 understand the behaviour of the new coronavirus. Already, with the help of experimentally  
59 determined structures, genomic data and annotations, a growing number of *in silico* work is  
60 suggesting potential solutions to the COVID-19 pandemic using various techniques, including the  
61 use of molecular modelling, network-analysis [17–20] and machine learning [2,21–24]. Collectively,  
62 these may pave the way to a potential solution. In this study we report on some of the recently  
63 emerged mutations of the SARS-CoV-2 M<sup>pro</sup> protein, and investigate different aspects of their  
64 dynamics of the using molecular dynamics.

65 The M<sup>pro</sup> enzyme, also known as the 3C-like protease, is one of the best studied drug targets  
66 among the coronaviruses [25]. This is mainly due to the similarities in active site and mechanisms  
67 with the related pathogenic betacoronaviruses from previous epidemics of SARS-CoV and MERS-  
68 CoV (Middle East respiratory syndrome coronavirus) [26]. M<sup>pro</sup> is a conserved drug target present  
69 in all members of the *Coronavirinae* subfamily [27,28] and is highly similar to its SARS-CoV  
70 counterpart [26]. SARS-CoV-2 M<sup>pro</sup> does not have a human homolog [20], which reduces the  
71 chances of accidentally targeting host proteins. Alongside the papain-like protease (PLP) enzyme,  
72 M<sup>pro</sup> plays an essential role in the process of viral maturation [2], cleaving the large precursor  
73 replicase polyprotein 1ab to produce 16 non-structural proteins [2,29]. The cysteine protease  
74 functions as a homodimer and mainly comprises three domains (I-III) [2]. Homo-dimerisation plays  
75 an important role in the catalytic activity of M<sup>pro</sup>, as reported in the case of the SARS CoV M<sup>pro</sup>  
76 homolog, where the G11A mutation completely abolished its activity by interfering with the  
77 insertion of the “N-finger” region (residues 1-9) [30]. At the N-terminus the chymotrypsin-like  
78 domain I (residues 10-99) is connected to the picornavirus 3C-protease like domain II (residues 100-  
79 182), which together form a hydrophobic substrate binding site, with catalytic residues CYS145 and  
80 HIS41 [29,31]. Domain III (residues 198-303; also referred to as the helical domain) is connected to  
81 domain II [32] by a 15 residue linker loop. While each domain minimally contacts its equivalent  
82 domain from the alternate chain, the majority of the dimer contact interface is a result of  
83 interactions present between domain II (chain A) and the N-finger (chain B) [29]. In the same  
84 manner, the N-finger from chain A contacts domain II from chain B. Each chain is referred to as a  
85 protomer [22,29,33] ⊙.

86 In this work we study the collective effects of various M<sup>pro</sup> mutations of from a filtered sample  
87 50 isolates of SARS-CoV-2 by first mapping them on 3D structures and performing all-atom  
88 molecular dynamics (MD) for each of the mutants, in addition to the reference protein. All-atom  
89 simulations were carried out at a constant protonation state corresponding to a pH of 7. Multiple  
90 aspects of the protein dynamics were analysed using a battery of techniques, including the  
91 averaged *betweenness centrality* (BC) - a metric of Dynamic Residue Network (DRN) analysis,  
92 dynamic cross-correlation (DCC) [34], geometry calculations (inter-domain angles and  
93 interprotomer distances) based on the centre of mass (COM), cavity compaction analyses, and the  
94 analysis of residue and backbone fluctuations. Coarse-grained Monte Carlo simulations were also  
95 independently investigated.

96  
97  
98

## 99 2. Results and discussion

### 100 2.1. Analysis of residue mutations and their distribution in the 3D structure

101 As a preliminary investigation of the propensity of the sequences to acquire novel mutations,  
102 unique residue mutations were determined across our set of 50 protein sequences, which were  
103 filtered from the GISAID database [9]. While we cannot infer population frequencies (across the  
104 world) from our relatively small sample, we show from our estimate that multiple non-  
105 synonymous mutations have already occurred on each domain of the M<sup>Pro</sup> (Fig. 1). These include the  
106 following mutations: A7V, G15D/S, M17I, V20L, T45I, D48E, M49I, R60C, K61R, A70T, G71S, L89F,  
107 K90R, P99L, Y101C, R105H, P108S, A116V, A129V, P132L, T135I, I136V, N151D, V157I/L, C160S,  
108 A173V, P184L/S, T190I, A191V, A193V, T196M, T198I, T201A, L220F, L232F, A234V, K236R, Y237H,  
109 D248E, A255V, T259I, A260V, V261A, A266V, N274D, R279C and S301L. From these, it can be  
110 observed that many mutations are inter-conversions of the hydrophobic side-chain residues alanine  
111 and valine. As seen in Fig. 1, most residue mutations have occurred in solvent-accessible surfaces,  
112 with the exception of A7V, V20L, L89F, A116V, A129V, T135I, I136V, V157I/L, C160S, A173V, T201A,  
113 A234V and A266V, which were predicted to be buried by the PyMOL script *findSurfaceResidues*,  
114 using the default cut-off of 2.5 Å<sup>2</sup>.

115 Further, a higher rate of non-synonymous mutations has occurred at residue position 15  
116 (G15D/S) in domain I, residue position 157 (V157I/L) in domain II and at position 184 (P184L/S)  
117 within the inter-domain linker region. On the 3D structure, it can be seen that these mutable areas  
118 occur away from the core areas of domains I and II, hence the probable lower selective pressure for  
119 these regions. For this reason, we posit that individually, these loci may be less important for basic  
120 enzymatic function. Mutation rates of RNA viruses are known to be generally high, endowing them  
121 with the ability to escape host immune responses, improve their virulence, and even change tissue  
122 tropism [11,35]. However, extinction events are not uncommon among the RNA viruses, as seen in  
123 the influenza A H1N1 strains [36] and the previous SARS-CoV strain [37], and are presumed to be  
124 associated with the gradual accumulation of non-synonymous mutations. On the other hand, a  
125 reduction in replicative speed and genetic diversity was independently observed in the poliovirus  
126 3D<sup>G64S</sup> mutant compared to its wild-type (WT) when rates of mutation were artificially increased by  
127 exposure to a mutagen [11,38,39]. In the case of the HIV, multiple mutations of minor effect are  
128 known to collaboratively modulate the effect of other advantageous mutations already present in  
129 the protease [40,41]. As a newly emerged pathogen with a relatively long incubation period and an  
130 incompletely understood biology, these facts from related viruses presuppose a potentially complex  
131 mechanism of evolution and adaptation, which suggests that mutations have to be closely  
132 monitored for global health and security.

133 It is interesting to note that amongst the buried residue mutations, domain II has accumulated  
134 the highest number of these mutations in such little time, which may suggest a certain degree of  
135 tolerance to mutations in that region, despite their presence within beta strands. In the same  
136 domain, the A116V mutation occurs on a beta strand, which is supported by a rich network of  
137 hydrogen bonds. The local impacts of the A116V mutation are discussed further in section 2.2.

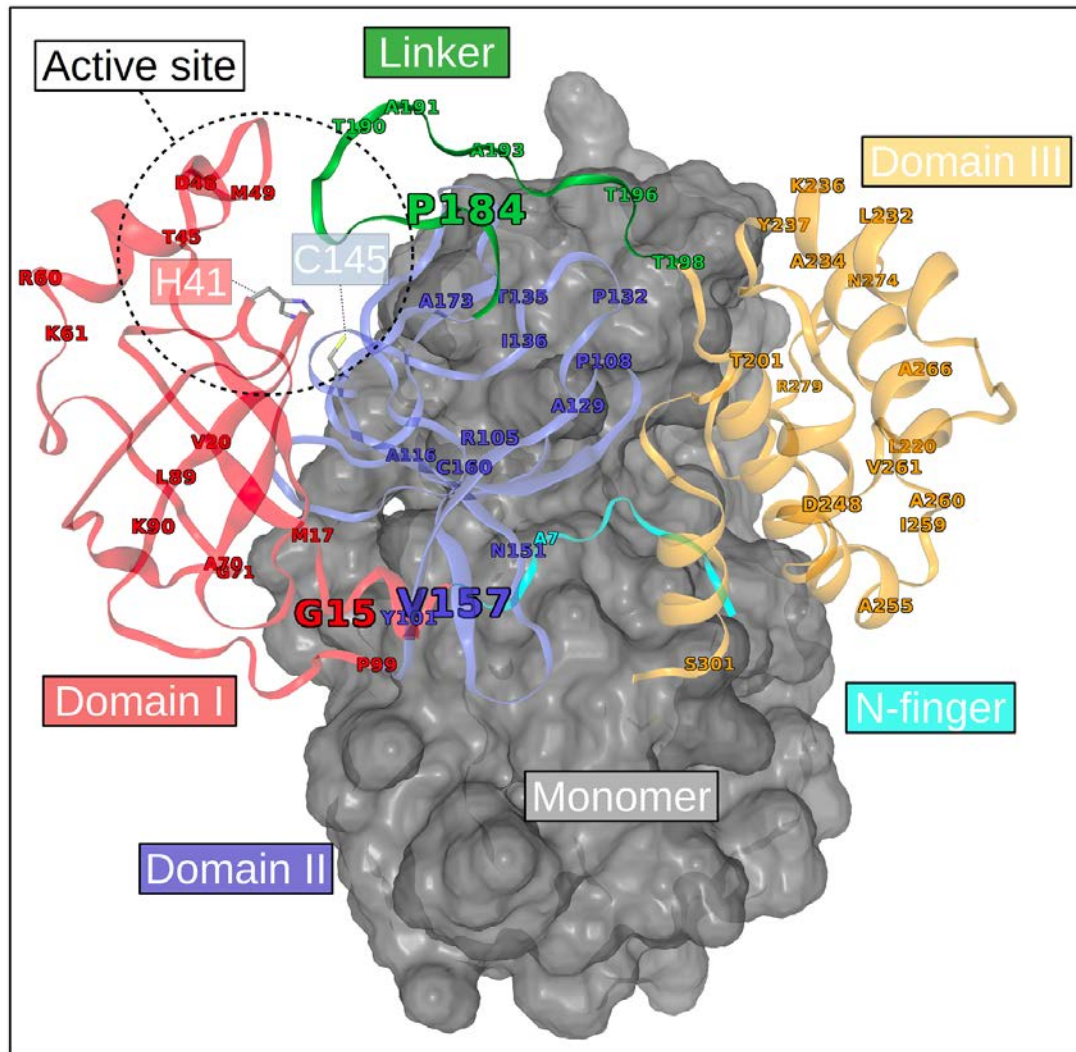

138  
 139 **Fig. 1.** Mapping of the positions showing unique mutations from the reference M<sup>pro</sup> sequence. For clarity,  
 140 domains (I-III) are coloured (red, blue and orange respectively) only for one of the monomers, while the other  
 141 is represented as a grey surface. The domain linker region is in green and the N-finger is in cyan. The size of  
 142 the labels denotes the number of unique mutations recorded at that position.  
 143

144 While several mutations are present in domain III, the current data suggests that these have  
 145 not (yet) further evolved at these positions, and probably suggests that there might a higher fitness  
 146 cost involved with mutating residues from this domain. It is also possible that under-sampling may  
 147 lead to a similar observation. Most of the mutations have occurred in solvent-exposed surfaces of  
 148 the protein, which may be under reduced selective pressure, especially if these are in loop regions.  
 149 On the other hand, interfacial residue mutations (particularly at the chain interface) may exert their  
 150 effects in a more exacerbated manner by either over-stabilising or destabilising protein-protein  
 151 interactions, as reported in work on other proteins [42,43]. One such mutation has already  
 152 happened at position 7 (A7V) in the N-finger region – a region that is vital for enzymatic activity  
 153 [31]. The local impacts of the A7V mutation are discussed in section 2.2.

## 154 2.2. Homology modelling and inspection of residue protonation states

155 After the preliminary analysis of M<sup>pro</sup> at the sequence level, their 3D structures were built for  
 156 further investigation. The z-DOPE scores for the best homology models obtained for each sample  
 157 were all below -1, indicating that they were all native-like [51,52]. Overall, z-DOPE values had a  
 158 minimum of -1.48, a maximum of -1.38, with a median of -1.42. While it is not possible to simulate  
 159 changes in protonation state using classical MD, an initial approximation of the most prevalent  
 160 residue protonation states (at pH 7) was used for each of the M<sup>pro</sup> samples. As there was a relatively

161 higher level of variation in residue protonation states amongst each of the seven histidine residues  
 162 found in each M<sup>pro</sup> protomer, only the catalytic residue and the non-synonymous mutations are  
 163 described herein, post homology modelling. We suspect that the high number of titratable amino  
 164 acids may play a role in influencing protein behaviour at varying pH levels. Previous work in SARS  
 165 CoV reports of a “pH-dependent activity-switch” of the main protease [53]. In our case, the catalytic  
 166 residue HIS41 was generally protonated at the delta nitrogen (HID) atom, but also occurred in its  
 167 fully protonated state (HIP) in one of the protomers for samples EPI\_ISL\_419710 and  
 168 EPI\_ISL\_425655. Protonated aspartic acid (ASH) was found in both protomers of sample  
 169 EPI\_ISL\_420510, which was the only isolate to contain the N151D mutation. ASH was also found in  
 170 sample EPI\_ISL\_421312, for only one of its protomers at residue position 289, which otherwise  
 171 occurs in its deprotonated form in all other samples. The R105H mutation (present only in sample  
 172 EPI\_ISL\_419984) occurs as a HID in each protomer. Similarly the Y237H mutation, present only in  
 173 sample EPI\_ISL\_416720 occurs as HID in both of its protomers.

174 The local residue interactions around residue mutations of interest were also investigated, by  
 175 comparing them with their equivalent position in the M<sup>pro</sup> reference, using their modelled structure.  
 176 These mutations comprised residues that underwent a higher number of mutations (G15D/S,  
 177 V157I/L and P184L/S) in addition to mutations that occurred at or close to the dimer interface (A7V  
 178 and A116V). A7V significantly increased the number of proximal interactions to neighbouring  
 179 residues when compared to the reference protein (Fig. 2), and gaining in hydrophobic interactions,  
 180 although a clash in van der Waal radius is additionally present. G15D is found to increase the  
 181 number of proximal contacts by the largest extent, while also modestly increasing the number of  
 182 hydrophobic interactions. By replacing alanine with valine at position 116, increased amount of  
 183 proximal interactions is gained at V116 in sample EPI\_ISL\_425284, with an increased amount of  
 184 hydrophobic contacts to the residue. Mutations V157I/L both reduced the number of local  
 185 hydrophobic contacts and resulted in a reduced van der Waal clash compared to the reference.  
 186 P184L had a reduced number of proximal contacts compared to the reference, while P184S was very  
 187 similar to its equivalent position in the reference. These observations only give a general indication  
 188 of the local changes present in the static starting structures. In the sections that follow, the dynamic  
 189 aspects of M<sup>pro</sup> are investigated.

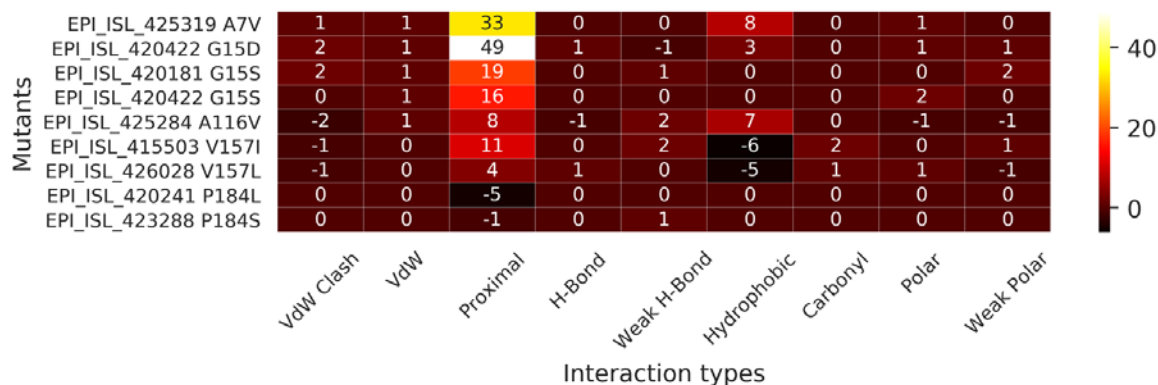

190  
 191 **Fig. 2.** Differences in the sum of each interaction type for the M<sup>pro</sup> only for the residue locations that either  
 192 accumulated more than one non-synonymous mutation or ones occurring at protein interfaces. The differences  
 193 were obtained by subtracting the reference values from the matching residue loci in the mutant. Sample names  
 194 and the selected residue mutations are shown along the y-axis.

### 195 2.3. Estimation of the protein backbone flexibility from MD using C<sub>α</sub> RMSD

196 The C<sub>α</sub> RMSD obtained after frame fitting to the initial frames and periodic image correction  
 197 (Fig. 3A) showed noticeably higher backbone flexibility for the isolates EPI\_ISL\_416720,  
 198 EPI\_ISL\_420610, EPI\_ISL\_421380, EPI\_ISL\_421763, EPI\_ISL\_423772, EPI\_ISL\_425284,  
 199 EPI\_ISL\_425319 EPI\_ISL\_425886 and EPI\_ISL\_426097. Additionally, from the shapes of the kernel  
 200 density plots, it can be seen that some mutants may be equilibrating around single energy minima  
 201 (for uni-modal distributions), while others are selecting for multiple major conformations, as seen

202 from the multi-modal shapes. In all, these samples involve mutations A7V, M17I, A70T, A116V,  
203 K236R, Y237H, D248E, A266V and N274D, in which the last five mutations are exclusive to domain  
204 III. A7V occurs on the N-finger, which is a critical region for Mpro dimer stability. M17I occurs on  
205 an internal loop that connects a beta strand to a helix in domain I, while A70T occurs on solvent-  
206 exposed loop in the same domain. Mutation A116V occurs in a buried beta strand within domain II.  
207 From their visibly positively shifted upper quartiles, we may infer that more mobile backbones  
208 were sampled for mutants EPI\_ISL\_421380, EPI\_ISL\_423772 and EPI\_ISL\_425886. Upon visualising  
209 the trajectories, a slight twisting motion was observed between their protomers. More exactly, the  
210 protomers generally moved in opposite directions, whilst being tethered at the center. However, a  
211 similar motion was also observed in all other samples. This may indicate that the twisting motions  
212 are a normal behaviour of dimeric M<sup>pro</sup>, at least under our simulated conditions for the apo state.  
213 We suspect that the changes may rather be observable at more local levels, such at the intra/inter-  
214 domain or residue levels. This twisting motion is summarised using the first non-trivial mode  
215 (number 7) obtained from the anisotropic network model (ANM) of the reference protease (Fig. 3A).  
216 The predictions from ProDy [44] were visualised in VMD [45] ©.

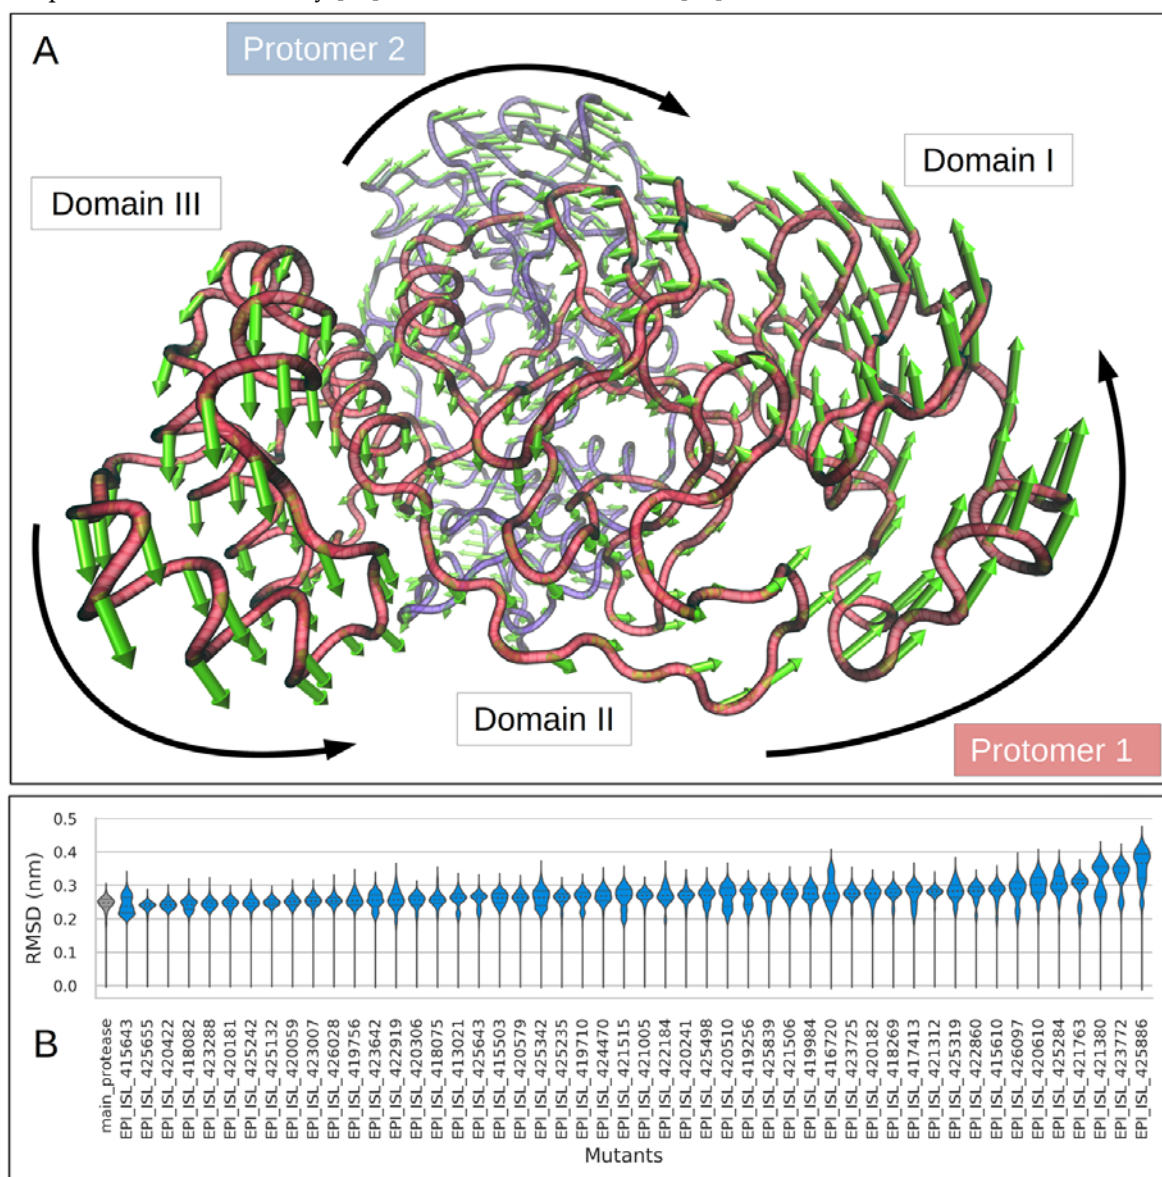

217  
218 **Fig. 3.** (A) The general twisting motion of the protomers observed across M<sup>pro</sup> samples, inferred  
219 from the reference protease using ANM. (B) Violin plots of C<sub>α</sub> RMSD values for the reference (in  
220 grey) and the mutant (coloured in blue) M<sup>pro</sup>, showing the 25<sup>th</sup>, 50<sup>th</sup> and 75<sup>th</sup> percentiles in dotted  
221 lines inside the kernel density plots. Distributions are scaled by counts, and have been sorted by  
222 median RMSD for the mutants.

#### 223 2.4. Estimation of the N-finger flexibility from MD using all-atom RMSD

224 The N-finger region is an important structural foundation required for the stabilisation of the  
225 functional M<sup>Pro</sup> dimer. Therefore we investigated its mobility within the dimeric protein across all  
226 M<sup>Pro</sup> samples. After fitting the proteins globally, no further fitting was done for the N-finger in order  
227 to better represent the N-finger motions. As seen in Fig 4., the reference protein has a very stable N-  
228 finger conformation, although the protomer equilibria are different. This tendency towards  
229 asymmetry is seen in most cases, with the exception of samples EPS\_ISL\_417413, EPS\_ISL\_421506,  
230 and to some extent EPS\_ISL\_425235. Additionally multimodal distributions are observed in several  
231 cases, which clearly suggest the presence of multiple equilibrium states for the N-finger. The most  
232 prominent peak is seen in sample EPS\_ISL\_423772, which corresponds to a larger amount of time  
233 spent away from a stable conformational equilibrium, even though a stable equilibrium was also  
234 visited (the lowest mode). While the mutation occurs on a beta strand located in a core area of the  
235 protein, the non-bonded interactions are similar for both M17 and I17. Out of 50 samples, only 10  
236 sampled N-finger RMSD values similar to those of the reference chains. The rest displayed values of  
237 varying higher magnitude and duration displayed distributions suggestive of decreased stability.  
238 From this observation we can conclude that while the virus is still trying to evolve to past the  
239 human immune system, it could be accumulating mutations that can potentially make it less  
240 enzymatically active. However, with a relatively stable foundation in the 10 aforementioned  
241 samples (bearing mutations A255V, P99L, G15S, I136V, L232F, Y101C, A234V, V20L and T135I), it is  
242 possible that these may assist in perpetuating immune escape, without decreasing the enzymatic  
243 turnover rate.  
244

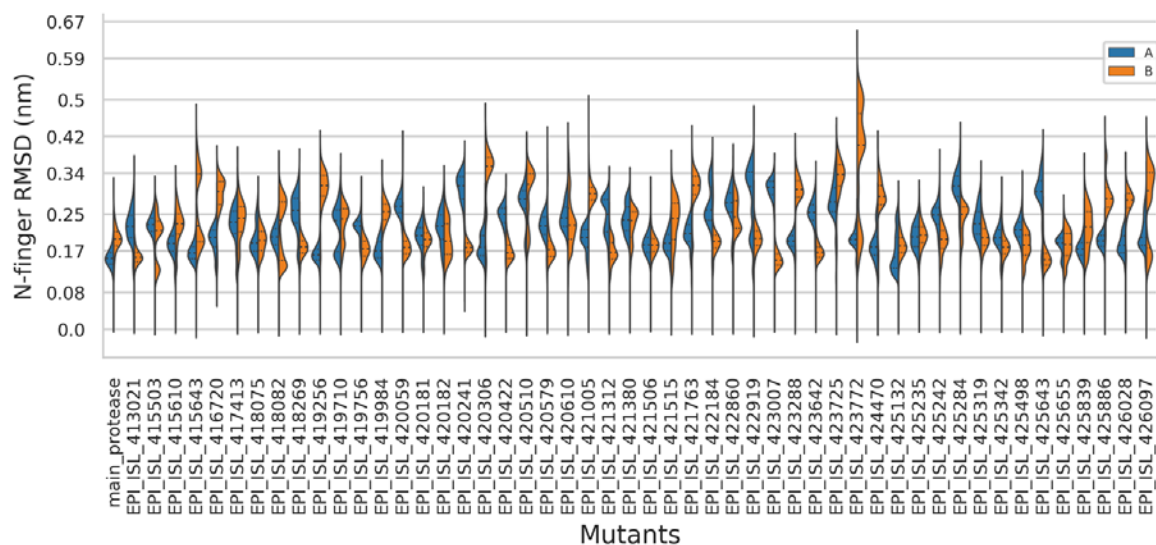

245 **Fig. 4.** Kernel density distributions of RMSD values for the N-finger region across the mutant and  
246 reference protease complexes. The violin plots are split in two for each protein sample, showing the  
247 RMSD values for chains A (in blue) and B (in red). The tips of the distributions mark the minimum  
248 and maximum values for both chains combined in each complex.  
249

#### 250 2.5. Analysis of residue fluctuations and BC across M<sup>Pro</sup> samples

251 The analysis of residue fluctuations shows that there are generally interspersed areas of low  
252 and high flexibility along M<sup>Pro</sup> (Supplementary Fig. S1). Some local areas of higher flexibility were  
253 also seen, as is generally observed in unstructured secondary structures [54]. Additionally, from the  
254 lack of a clustering between chains belonging to the same sample for each segment of M<sup>Pro</sup>  
255 (Supplementary Fig. A1; cluster tree was removed for figure visibility), we conclude that the residue  
256 dynamics for the same domain between alternate chains of M<sup>Pro</sup> are asymmetric in the dimeric apo  
257 form. Focusing onto the specific regions of M<sup>Pro</sup>, it can be seen that the N-terminal region of the N-  
258 finger generally displayed moderate residue fluctuations despite being sandwiched at the interface

259 of the two M<sup>pro</sup> chains, suggesting that it is not entirely immovable. Domain I is generally  
260 moderately flexible at residue positions 22-25, 33-34 and 92-93. Higher flexibility was globally  
261 observed along the intervals 45-65 and 71-74, and at position 76. Very high fluctuations were  
262 recorded for a subset of mutants at positions 46-54 most particularly for only one chain amongst the  
263 mutants EPI\_ISL\_416720, EPI\_ISL\_423642, EPI\_ISL\_415503 and EPI\_ISL\_425886, thus reinforcing  
264 the observation of asymmetry between chains. Mutations from samples EPI\_ISL\_416720 and  
265 EPI\_ISL\_425886 were already found to lead to increased backbone fluctuation using RMSD. The  
266 Y237H mutation in EPI\_ISL\_416720 introduces two carbon H-bonds (one with L272 and another  
267 with V237), in addition to the pi-alkyl interaction that is present in both the reference and this  
268 mutant, which seem to hold the solvent helices together in domain III. In a review by Horowitz and  
269 Trievel, the carbon H-bond was highlighted as an underappreciated interaction that is otherwise  
270 widespread in proteins, with the ability to form interactions as strong as conventional H-bonds via  
271 polarisation [55]. It is possible that such an increase in interaction may increase the stability around  
272 this region in domain III for the Y237H mutation. In the case of D248E mutation in EPI\_ISL\_425886,  
273 the D248 side chain is H-bonded to Q244 in the reference structure, possibly stabilising the helical  
274 structure. This interaction is absent upon mutating to an E248. In the last frame from MD, the side  
275 chain epsilon oxygen was found to interact with its backbone hydrogen atom, indicating a  
276 decreased stabilisation of the helical region of domain III. T201A in EPI\_ISL\_423642 abolishes the H-  
277 bond that is otherwise present between T201 and the backbone oxygen atom of E240, very likely  
278 weakening their interaction. The V157I mutation in EPI\_ISL\_415503 does not significantly alter the  
279 non-bonded interactions, but occurs on a beta strand on domain II. A unique behaviour was  
280 observed in the case of chain B of EPI\_ISL\_423772, where the leading residues of the N-finger were  
281 the most flexible while the rest of the protein was the least flexible across all samples. However, the  
282 M17I mutation does not significantly change the non-bonded interaction in EPI\_ISL\_423772, but  
283 occurs on a beta strand in domain I. Domain II is most flexible across all samples at residue position  
284 153-155. Moderate flexibility is generally observed at residue positions 100, 107, 119, 137, 141-142,  
285 165-171, 178 and 180. The linker region was generally highly flexible in all cases within the region  
286 spanned by residues 188-197. Notably higher fluctuations were observed at position 185 in samples  
287 EPI\_ISL\_420610 (chain B) and EPI\_ISL\_423007 (chain A). Across all domains, parts of domain III  
288 contain the most flexible residues within M<sup>pro</sup>. It is highly flexible at residue positions 222-224, 231-  
289 233, 235-236, 244-245 and 273-279. The high fluctuations observed C-terminus residues may not be  
290 very informative in our case as they freely interact with the solvent and do not have a strong  
291 enough network of non-bonded interactions with the M<sup>pro</sup> domains. As a whole, from the empirical  
292 cumulative distribution (ECD) of averaged RMSF values across all M<sup>pro</sup> samples, the top 5%  
293 positions (most variable regions) comprise residues 222, 277, 223, 154, 47, 72, 50, 224, 232, 64, 279,  
294 236, 235, 244 and 51 ranging from 0.386 to 0.245 nm. The bottom 5% (most stable regions) of the  
295 distribution comprise positions 149, 146, 147, 174, 29, 113, 163, 39, 124, 150, 7, 175, 38, 161 and 173,  
296 ranging from 0.057 to 0.077 nm. On the 3D mapping (Fig. 5A), it can be seen that the regions with  
297 the highest flexibility are solvent exposed surfaces, comprising loops or parts of helices connected  
298 by loops. The central core of the enzyme has the lowest flexibility, most likely to provide structural  
299 stability to the functional dimer. Catalytic residues (HIS41 and CYS145) are connected to these  
300 stable core residues on one side. However, HIS41 is connected on the other side to a more mobile  
301 structure composed of a <sub>3</sub>10 helix connected by loops on each end, which forms a lid structure,  
302 similar to what is described earlier for previous human coronavirus strains [56,57] ©.

303



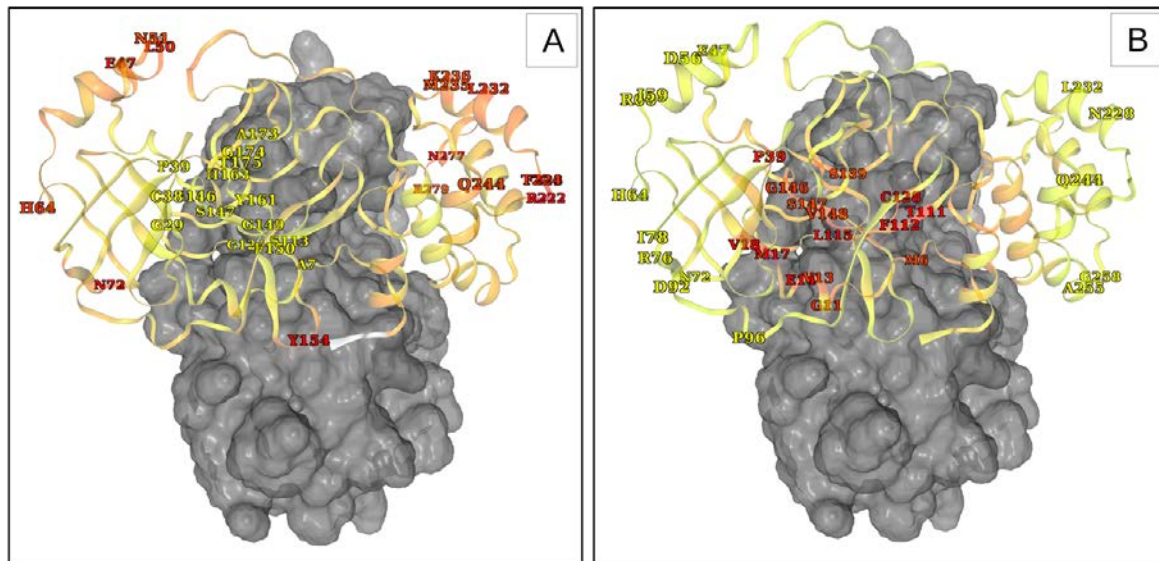

304  
305 **Fig. 5.** 3D mapping of averaged values for (A) RMSF and (B) the average  $BC$ , computed across all  
306  $M^{pro}$  samples. Only the extremes (top and bottom 5% of the ECD values across all samples) of  
307 averaged values are labelled for each metric. The lowest averaged values are in yellow while the  
308 highest ones are in red. The last three C-terminus residues (in white) were not mapped by RMSF as  
309 their high values would mask other values. While only one protomer is detailed, the data is  
310 applicable to both protomers. The other protomer is represented as a grey surface.

311  
312  $BC$  is a network centrality metric that is maximised when a large number of nodes ( $C_{\alpha}$  or  $GLY$   
313  $C_{\beta}$  atoms) traverse a single node along geodesic paths to reach nodes within a network. When  
314 averaged from MD frames, this metric has been shown to be approximately inversely related to  
315 RMSF [58]. These values were very similar across all samples (Supplementary Fig. A2). For this  
316 reason, the discussion of our findings will be around the overall  $BC$  behaviour recorded across all  
317 samples. High and low  $BC$  values are present within all domains (Supplementary Fig. A2). The N-  
318 finger was found to be generally composed of high  $BC$  residues, most likely due to its high degree  
319 of non-bonded interactions between the protease chains. A large portion of domains I and III have  
320 low  $BC$  values, most likely due to the comparatively lower amount of contact with protein surfaces,  
321 which allows for a relatively higher mobility compared to domain II. The top 5% highest averaged  
322  $BC$  values across all  $M^{pro}$  samples were either found in the monomer core regions or at the dimer  
323 interface, as seen in Fig. 5B. These comprised residue positions 17, 128, 115, 111, 112, 14, 18, 39, 11,  
324 13, 146, 148, 147, 139, 6 and 140 in descending order of overall averaged  $BC$  values, ranging from  
325 10480.987 to 6064.650. The residue positions within the lowest 5% overall averaged  $BC$  values  
326 comprise the positions 96, 72, 92, 258, 64, 244, 47, 59, 228, 56, 76, 60, 255, 78 and 232, ranging from  
327 8.095 to 46.251. A complete listing of the top  $BC$  residues for each protomer is given in Table S2.  
328 Compared to the high  $BC$  areas that correspond to very well maintained communication residues  
329 (which may well be actual functional sites [58]) the low  $BC$  values represent residues that are least  
330 important for maintaining the flow of communication across the protein, due to the transient nature  
331 of their short to medium ranged path lengths. From the computed sample average  $BC$  values and as  
332 seen the supplementary Table S2, residues positions 17 and 128 were found to occur as the most  
333 common first two residues in all cases. In the previous work done in human heat shock protein,  
334 high  $BC$  residues found within cavities were found to correspond to allosteric hotspots, as these had  
335 been independently verified by the sequential application of external forces on protein residues  
336 using the perturbation response scanning (PRS) method. In our case, however these two positions  
337 are not found in cavities, and are rather buried structural units that are not very mobile in the short  
338 to medium range. The high  $BC$  at M17 is possibly due to the increased stability imparted by the  
339 dimer interface. Due to the high centrality of these residues, it is possible that mutations leading to  
340 the alteration of their physicochemical activity may be accompanied by a decrease in the dimer  
341 stability.

## 342 2.6. Estimation of interprotomer distances using COM distance

343 The COM distance distributions between the  $M^{pro}$  protomers (Fig. 6) indicate that the  
344 distance between them can vary from over about 2.4 nm to 2.8 nm. Globally, which suggest the  
345 presence of at least two different equilibrium chain COM distances in these cases. More specifically,  
346 in isolates EPI\_ISL\_421763 and EPI\_ISL\_419984 a significant proportion of the sampled  
347 conformations depict the presence of closer chain COM values, though the percentage of such  
348 conformations is lower in EPI\_ISL\_419984. COM may be influenced to a certain extent by the shape  
349 of the domain arrangement and also plays a role in influencing the COM distance. Even though the  
350 distributions of interprotomer COM distances differ to varying degrees across samples, these  
351 differences may not be easily distinguished by visual inspection. Therefore, the next step was to  
352 quantify another aspect of the domain geometry, which is the inter-domain angle.

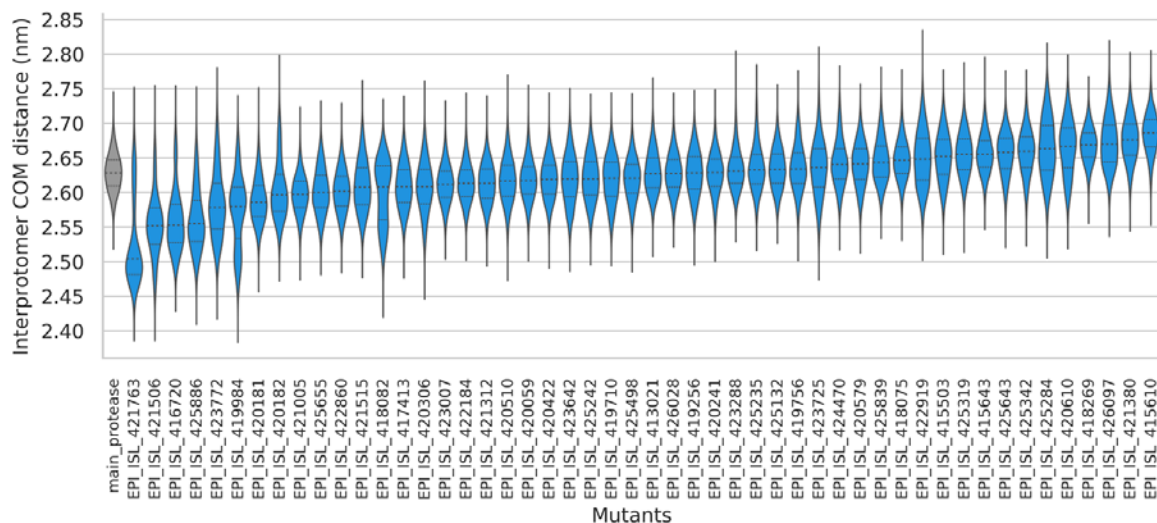

353 **Fig 6.** Distributions of interprotomer COM distances across samples, arranged in ascending order of  
354 average distance. The reference proteases are coloured in grey while the mutants are in blue.  
355

## 356 2.7. Estimation of inter-domain angles in each protomer of $M^{pro}$

357 The angle formed between domains I, II and II is has a relatively high information content for  $M^{pro}$   
358 dynamics. While both chains A and B behave similarly in the reference, a higher degree of inter-  
359 domain angle variation is seen across the mutants, comprising skewed distributions and angle  
360 asymmetries between protomers (Fig. 7). The angle distributions are similar to those of the  
361 reference in several cases, however there are also many cases where angle distributions differ, as  
362 seen in the samples EPI\_ISL\_425643, EPI\_ISL\_421312, EPI\_ISL\_420241, EPI\_ISL\_418075,  
363 EPI\_ISL\_421005, EPI\_ISL\_419756, EPI\_ISL\_425342, EPI\_ISL\_420181, EPI\_ISL\_419256,  
364 EPI\_ISL\_422860, EPI\_ISL\_423007, EPI\_ISL\_425839, EPI\_ISL\_425132, EPI\_ISL\_425284,  
365 EPI\_ISL\_421515, EPI\_ISL\_413021, EPI\_ISL\_417413, EPI\_ISL\_419710, EPI\_ISL\_418269,  
366 EPI\_ISL\_426028, EPI\_ISL\_423642, EPI\_ISL\_425886 and EPI\_ISL\_416720. Additionally, among these  
367 samples, chains A and B were found to sample more divergent inter-domain angles, as seen from  
368 the shifted quartiles in samples EPI\_ISL\_420241, EPI\_ISL\_421005, EPI\_ISL\_419756, EPI\_ISL\_419256,  
369 EPI\_ISL\_422860, EPI\_ISL\_423007, EPI\_ISL\_425839, EPI\_ISL\_425132, EPI\_ISL\_425284,  
370 EPI\_ISL\_421515, EPI\_ISL\_413021, EPI\_ISL\_417413, EPI\_ISL\_419710, EPI\_ISL\_423642,  
371 EPI\_ISL\_425886 and EPI\_ISL\_416720. This provides additional support behind our general  
372 observation of the protomers generally behaving in an independent manner. It is possible that this  
373 independence might be of functional importance. Due to the richness of information retrieved from  
374 the measurement inter-domain angles, we propose that this metric may help assist the *in silico*  
375 characterisation (or differentiation) of  $M^{pro}$  variants from future strains of SARS-CoV-2 should any  
376 particular virus-associated phenotype become available.

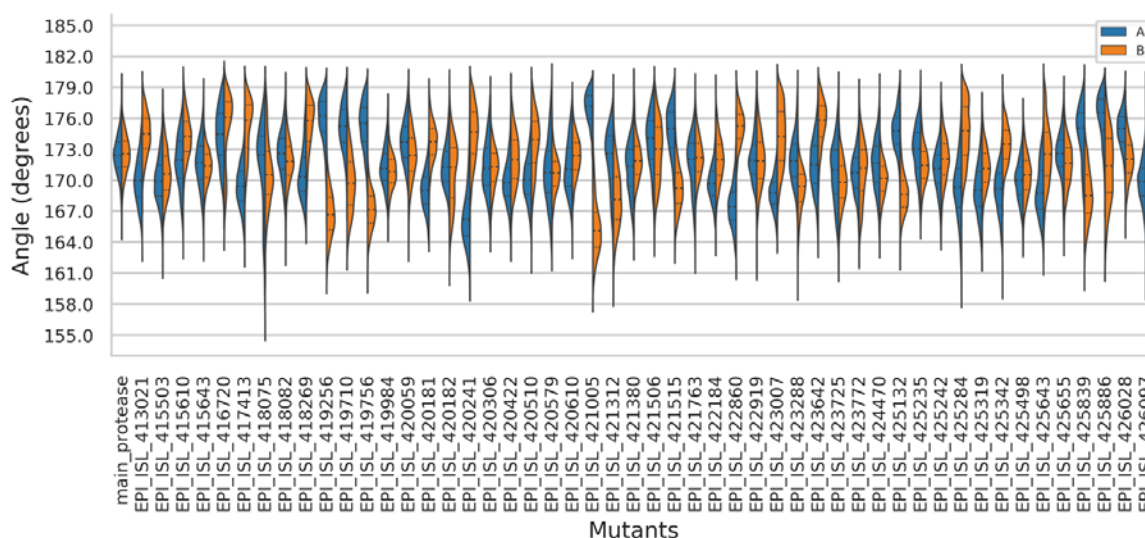

377  
378 **Fig. 7.** Kernel density distributions of inter-domain angles (domains I-II-III) across the mutant and  
379 reference protease complexes. The violin plots are split in two for each protein, showing the inter-  
380 domain angles for chains A (in blue) and B (in red). The tips of the distributions mark the minimum  
381 and maximum values for both chains combined in each protein complex.

## 382 2.8. Pocket detection and estimation of their compaction using $R_g$

383 Pocket predictions from FTMap [59] and PyVOL [60] were concordant for all cases, except for the  
384 substrate binding site, which FTMap did not detect (Fig. 8). However, a very good coverage of  
385 interprotomer cavities was obtained by combining both methods, but more interestingly a potential  
386 allosteric site was found at the interprotomer interface, next to the substrate binding site. It was  
387 mirrored across each side of the interacting protomers. For this reason, the dynamics of both  
388 pockets were examined, as this could play an important role in the dimerisation properties of the  
389 protomers. The substrate binding site from each protomer was also examined due to its already  
390 known functional importance in catalysis. While the substrate binding pockets are easily defined as  
391 belonging to a given protomer, the interfacial pocket is composed of residues from each chain,  
392 namely residues 116, 118, 123, 124, 139 and 141 on chain A, and residues 5-8, 111, 127, 291, 295, 298,  
393 299, 302, 303 on chain B. The mirrored interfacial pocket comprised the same residue positions, but  
394 for the opposite chain labels. The substrate binding site comprised residues 25, 26, 27, 41, 44, 49,  
395 140, 141, 142, 143, 144, 145, 163, 166 in each protomer. The FTMap probes formed identical cross-  
396 clusters composed of probe IDs 1amn, 1ady, 1eth and 1acn at each site, which respectively  
397 correspond to the compounds methylamine, acetaldehyde, ethane and acetonitrile. As noted from  
398 the probe chemical compositions, this dual site has the potential to accommodate compounds of  
399 low molecular weight, with no (or probably limited) rotatable bonds and a low octanol-water  
400 partition coefficients [61].  
401

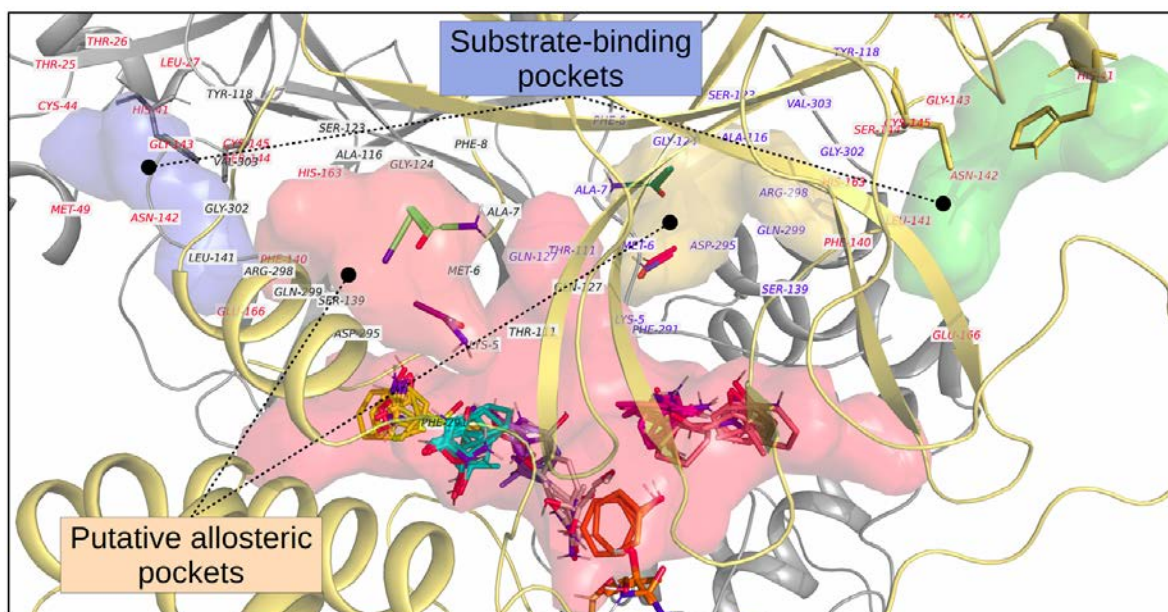

402  
403 **Fig. 8.** Pocket detection using combined predictions from FTMap and PyVOL. FTMap probes are  
404 shown as stick figure representations, while those from PyVOL are shown as surfaces. The  
405 protomers are depicted as cartoon representations, in grey and light orange.  
406

407 From the distributions of  $R_g$  values for the catalytic site (Fig. 9.), we promptly observe the  
408 asymmetry between substrate binding pockets coming from each protomer in each sample. Partial  
409 symmetry is seen in few cases, such as EPI\_ISL\_419710, EPI\_ISL\_425242, EPI\_ISL\_423007, 416720,  
410 EPI\_ISL\_421380, EPI\_ISL\_425284 and EPI\_ISL\_419256. In the reference sample we observed a  
411 shifted in equilibrium  $R_g$ , where one protomer oscillates around value while its counterpart also  
412 explores another. Multi-modal distributions indicate the presence of more than one equilibrium,  
413 which hints at cavity expansion and compaction movements. The most compact substrate binding  
414 cavities are observed in one of the protomers from sample EPI\_ISL\_425489, and to some extent  
415 samples EPI\_ISL\_418082 and EPI\_ISL\_423642.

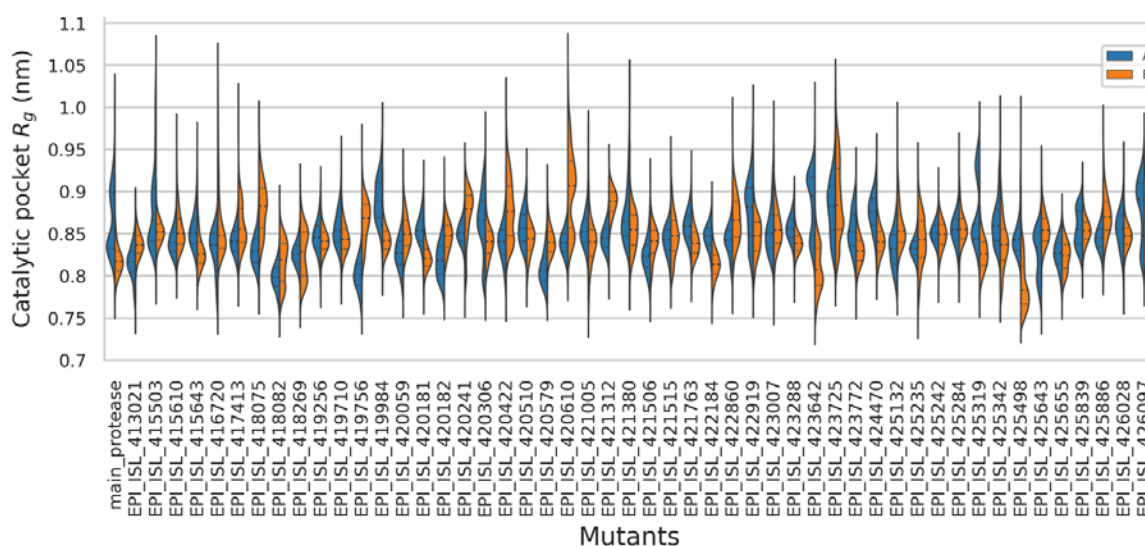

416  
417 **Fig. 9.** Kernel density distributions of  $R_g$  values for the substrate binding site from each protomer of  
418 M<sup>Pro</sup>. Chain A values are in red while chain B values are in blue. The maxima and minima are across  
419 protomers. Quartiles for each binding site are shown as dotted lines.  
420

421 As done for the substrate binding cavity, the degree of compaction of the interprotomer cavities was  
422 also measured. Here as well, the distributions are asymmetric (Fig. 10). It is tempting to do a  
423 comparison between the substrate binding cavity and the interprotomer pockets. However, when

424 the median  $R_g$  values obtained for the substrate binding pocket are correlated (using Spearman's  
425 correlation) against the corresponding medians for the interprotomer pocket across all samples, no  
426 significant correlation was obtained, even though in our case, residue 141 was shared between both  
427 pockets. On an individual level, however there is a significant degree of correlation between the  
428 interprotomer pocket and the substrate binding site, ranging from -0.68 to 0.54 (using Spearman's  
429 correlation), with p-values < 0.01 and absolute correlations > 0.1 for 64.9% of the sample  
430 comparisons (2 substrate binding site vs 2 interprotomer pockets for each sample). As the  
431 interprotomer pocket is mirrored between chains this may explain the negative correlations. From  
432 this finding we propose that the interprotomer pockets may play an important role in affecting the  
433 degree of compaction of the binding cavity and vice-versa. This suggests the possibility of a  
434 potentially bivalent modulation of the interprotomer pocket and the substrate binding site. As  $R_g$   
435 only captures the overall degree of compaction, it may not entirely inform us about the cavity  
436 volume accessible to an allosteric modulator, however this may be an interesting lead for allosteric  
437 modulator targeting.  
438

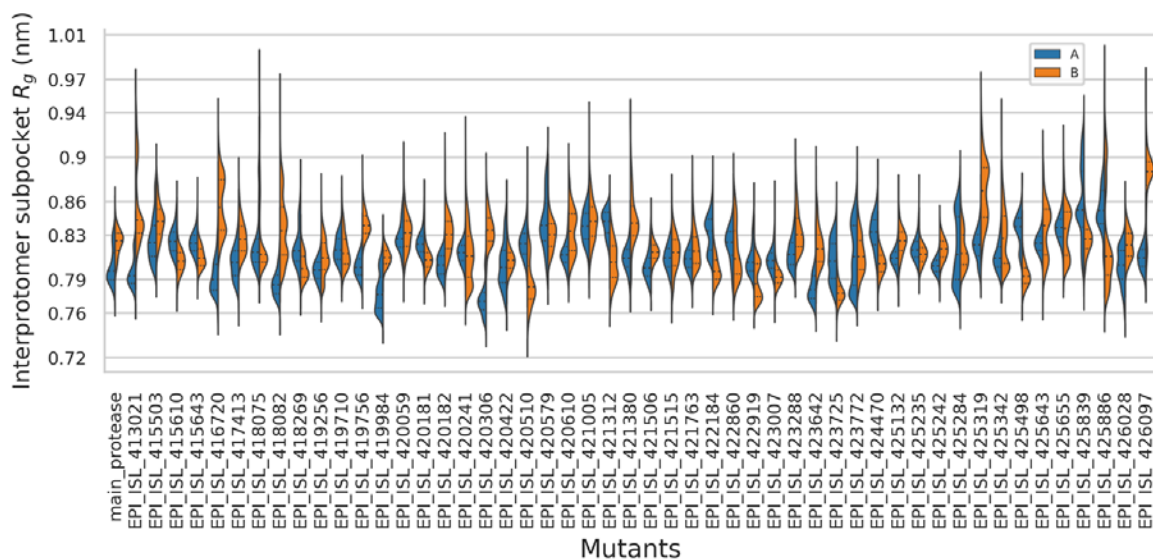

439  
440 **Fig. 10.** Kernel density distributions of  $R_g$  values across samples for the mirrored interfacial (and  
441 potentially allosteric) pockets.

### 442 2.9. Investigating correlated residue motions using Dynamic Cross Correlation

443 In order to compare the DCC across all samples, the DCC matrices were linearised before  
444 calculating pairwise correlations and clustering the final matrix (Fig. 11). While abstracting out the  
445 intricate details of residue correlation, clusters of correlated samples inform us on the global  
446 similarity of correlated protein motion across each pair of samples. From Fig 9. it can be seen that  
447 the samples are generally highly correlated, with the exception of samples EPI\_ISL\_415503,  
448 EPI\_ISL\_416720, EPI\_ISL\_419984, EPI\_ISL\_420241, EPI\_ISL\_422184, and EPI\_ISL\_418075, which  
449 form a sub-cluster of moderately correlated samples. Both EPI\_ISL\_415503 and EPI\_ISL\_416720  
450 have been described in section 2.6 as having higher RMSF values at positions positions 46-54 due to  
451 the mutations V157I and Y237H. Mutation R105H (occurring on a loop region) in EPI\_ISL\_419984  
452 leads to the loss of an H-bond with F181, but forms a pi-pi stacking interaction with Y182. The main  
453 difference in this case is in the higher protomer COM distance, as described in section 2.7. In sample  
454 EPI\_ISL\_420241, the P184L mutation occurs in a solvent-exposed loop and no major non-bonded  
455 interactions were detected from the side chains or backbone atoms. The main reason for the  
456 observed difference is due to the increased divergence in inter-domain angles sampled from MD. In  
457 the case of EPI\_ISL\_422184, as explained in section 2.3, it was found the N-finger from one chains  
458 moved by a larger extent at the end of the simulation (~93ns), diminishing its contacts with the  
459 alternate protomer, to interact more with its own protomer. This may be attributable to the S301L

460 mutation, which reduces H-bonding at the end of the C-terminal helical structure. In the reference,  
461 four H-bonds are formed between S301, and the backbone oxygen atoms of V297 and R298,  
462 whereas two H-bonds are formed by L301. Sample EPI\_ISL\_418075 had the lowest correlation  
463 compared to all samples. Upon closer examination, it was found that the terminal alpha helix for  
464 each protomer was getting gradually destabilised towards the end of the simulation. This is very  
465 likely an artefact linked to the absence of the two C-terminal residues, as the residue is solvent  
466 exposed protein and display very similar residue interactions at the position 255 in both the  
467 reference and the mutant, even though A255V occurs on a helix.

468 A main observation across all samples is that residues within their individual domains are  
469 highly positively correlated within their respective domains. Domains I and II are seen to share a  
470 high degree of correlation with each other, behaving as a single unit most likely to maintain the  
471 integrity of the catalytic surface. From the simulated we find that domain III is generally not  
472 positively correlated with any of the other two domains, and can even be negatively correlated with  
473 itself on the alternate chain, and may suggest a degree of independence for domain III in terms of  
474 dynamics and possibly function as well, at least in its dimeric apo form.

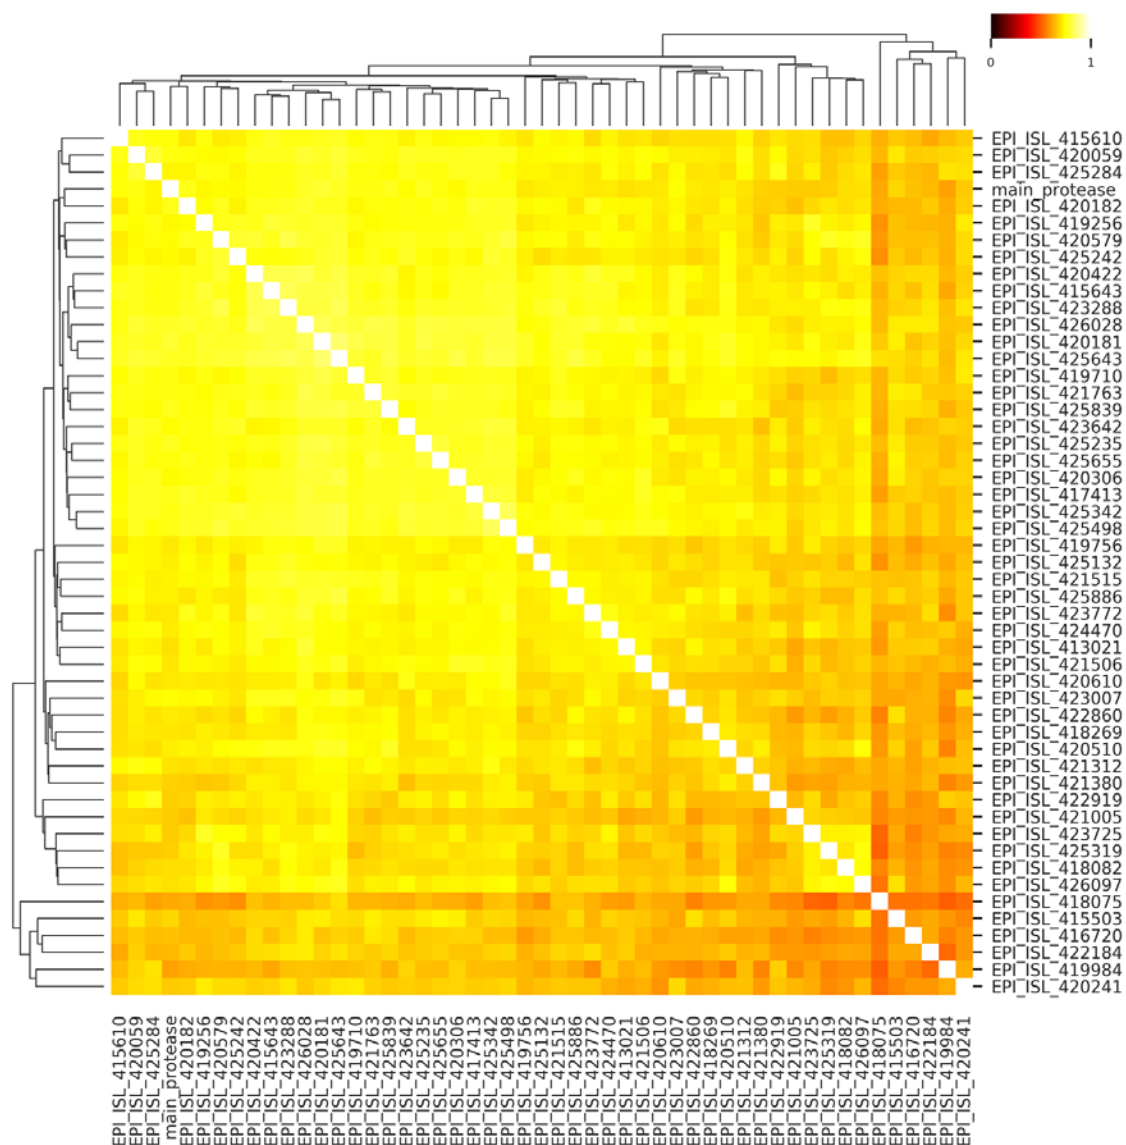

478 **Fig. 11.** Heat map of correlations obtained from the linearised DCC matrices for the mutants and  
479 the reference M<sup>Pro</sup> clustered using the Euclidean distance.

478 2.10. Coarse-grained simulations of SARS-CoV-2 main protease structures reveal relationships between muta  
479 tional patterns and functional motions

480 To complement all-atom MD simulations and obtain a more granular description of structural  
481 dynamics in studied systems, we performed coarse-grained (CG) simulations of in the SARS-CoV-2  
482 main protease structures in the free and ligand-bound forms using the CABS approach [46–50] (Fig.  
483 12). By using a large number of independent CG simulations, we obtained conformational  
484 dynamics profiles for the studied systems and analysed these distributions in the context of  
485 examined mutations.

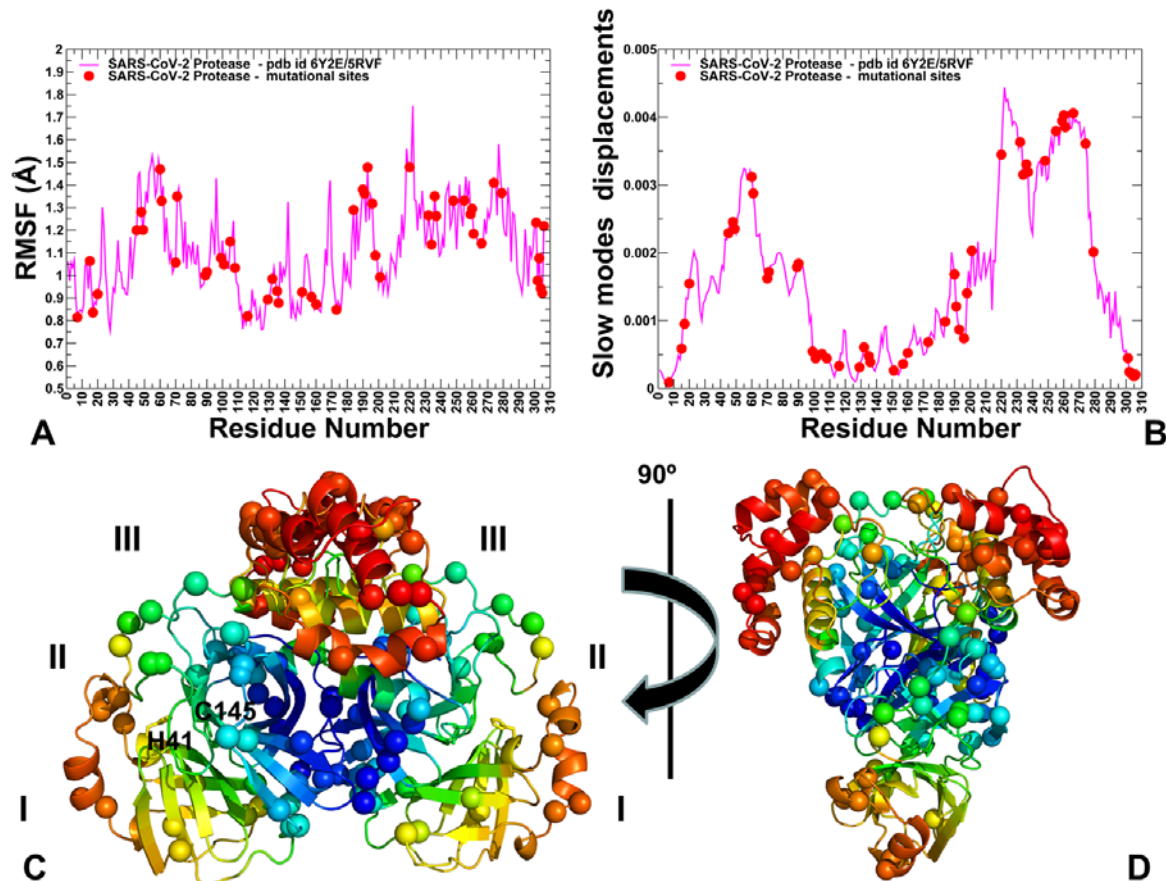

486 **Fig. 12.** Conformational dynamics and collective motion slow mode profiles of the SARS-CoV-2  
487 main protease structures (A) The computed root mean square deviations (RMSF) from CG MC  
488 dynamics simulations of the free enzyme of SARS-CoV-2 main protease (PDB ID: 5RVF, 6Y2E). The  
489 profile is shown in magenta lines. The positions of the residues undergoing mutations are shown in  
490 red filled circles (A7, G15, M17, V20, T45, D48, M49, R60, K61, A70, G71, L89, K90, P99, Y101, R105,  
491 P108, A116, A129, P132, T135, I136, N151, V157, C160, A173, P184, T190, A191, A193, T196, T198,  
492 T201, L220, L232, A234, K236, Y237, D248, A255, T259, A260, V261, A266, N274, R279 and S301L).  
493 (B) PCA analysis of functional dynamics SARS-CoV-2 main protease structures. The slow mode  
494 shapes are shown as mean square fluctuations averaged over first five lowest frequency modes (in  
495 magenta lines). The residues undergoing mutations are shown in red filled circles as in the panel A.  
496 (C) Structural map of the functional dynamics profiles derived from CG-MD simulations in the  
497 SARS-CoV-2 main protease (PDB ID: 5RVF, 6Y2E). The colour gradient from blue to red indicates  
498 the decreasing structural rigidity and increasing flexibility as averaged over the first five low  
499 frequency modes. The positions of the residues undergoing mutations are shown in spheres  
500 coloured according to their level of rigidity/flexibility in slow modes (blue-rigid, red-flexible). The  
501 locations of the protease domains I, II, and III are indicated. The catalytic residues HIS41 and  
502 CYS145 are shown in sticks. (D) The rotated view for the structural map of functional dynamics  
503 profiles in the SARS-CoV-2 main protease with sites of mutations in spheres.  
504  
505

506 RMSF of protein residues revealed the distribution of stable and flexible regions, thereby  
507 allowing the assessment of the extent of mobility for mutational sites (Fig. 12, panel A). In the  
508 domain I the most flexible residues are in the region 45-75, while for domain II the L2 loop (residues

509 165–172 and L3 (residues 185–200) located around the substrate-binding pocket also harbour a  
510 significant number of flexible positions. In addition, we observed significant fluctuations for surface  
511 residues 153–155 and 274–277 (Fig. 12, panel A). Of particular interest is the distribution of stable  
512 and flexible residues in the substrate binding pocket. Some pocket residues from domain I (T24,  
513 T25, T26, and L27) experience moderate fluctuations, while several other sites (M49, Y54) displayed  
514 considerably higher mobility. Another group of the substrate binding site residues from domain II  
515 (S139, F140, Q189 ) also exhibited appreciable fluctuations, while residues G143, S144, H164, H163,  
516 E166, P168 C145 showed only moderate changes and remained stable in CG simulations (Fig. 12,  
517 panel A). Notably and as expected the catalytic residues C145 and H41 from the substrate binding  
518 site also remained stable. The analysis generally showed that domain II residues were stable, while  
519 domain III (residues 198 to 303) showed more flexibility, especially in the peripheral solvent-  
520 exposed regions. This domain is involved in regulation of the dimerisation through a salt-bridge  
521 interaction between GLU290 of one protomer and ARG4 of the other protomer. Importantly, we  
522 found that these residues remained extremely stable in simulations. Interestingly, buried positions  
523 subjected to mutations exhibited different level of flexibility. While positions A7, V20, A116, A129,  
524 T135, I136, V157, C160, A173, and T201 were very stable, other buried sites with registered  
525 mutations in the domain III (A234, A266) showed larger fluctuations. It is worth mentioning that  
526 the interfacial residue A7 in the N-finger region important for enzymatic activity showed extreme  
527 level of rigidity.

528 Simulation-derived residue-residue couplings were evaluated using principal component  
529 analysis (PCA). By comparing slow mode profiles we found that functionally significant patterns  
530 can be yielded with up to the five slowest eigenvectors that account for ~90% of the total variance of  
531 the dynamic fluctuations. The functional dynamics profile averaged over the five slow modes  
532 showed that the domain I (residues 10-99) and domain III (residues 198-303) are mostly mobile in  
533 functional motions and can undergo large structural changes (Fig. 12, panel B). At the same time,  
534 domain II (residues 100-182), is mostly stable during functional dynamics. The distribution of  
535 mutational sites clearly indicated the existence of two major clusters. One cluster of mutations is  
536 located in highly mobile regions of domain III (T198I, T201A, L220F, L232F, A234V, K236R, Y237H,  
537 D248E, A255V, T259I, A260V, V261A, A266V, N274D, R279C and S301L). These residues involved in  
538 protein motion are likely under different evolutionary constraints than are other functional sites.  
539 Another cluster of mutations is distributed in the domain II and includes 3 subgroups: a group of  
540 fully immobilized positions (A116V, A129V, P132L, T135I, I136V), a group of bridging (hinge-like)  
541 sites that connect rigid and flexible regions (Y101C, R105H, P108S, N151D, V157I/L, C160S, A173V,  
542 P184L/S) and a group of mostly mobile residues (T190I, A191V, A193V) (Fig. 12, panel B). The group  
543 of potential hinge sites may be important for controlling regulatory motions and mutations in these  
544 regions (such as V157I/L, P184L/S) may affect global movements in the protease and its enzymatic  
545 activity.

546 It is particularly important to dissect the connection between the function of some key residues  
547 and their contribution in collective movements. The dimerisation residues (R4, M6, S10, G11, E14,  
548 N28, S139, F140, S147, E166, E290, R298) are characterized by different local flexibility but tend to  
549 correspond to low moving regions of the protein in collective motions (Fig. 12, panel C, D). The key  
550 substrate binding residues (H163, H164, M165, E166, and L167) are located at the very border of  
551 structurally immobilized and more flexible regions, and as such may constitute a hinge region that  
552 controls cooperative movements. Notably, some other binding site residues D187, R188, Q189, T190,  
553 and A191 are more flexible in slow modes and may undergo functional motions. Substrate  
554 recognition sites tend to exhibit structural flexibility and sequence variations so as to enable specific  
555 recognition required for mediating substrate specificity. We also explored the functional dynamics  
556 profile of the ligand bound protease complex (Fig. 13). This structural map clearly illustrated that  
557 the ligand binding site is comprised of both rigid and flexible residues and located in the region  
558 that bridges area of high and low structural stability. In particular, we highlighted that residues S46,  
559 M49, T190, A191 in the substrate recognition site and in the ligand proximity may belong to moving  
560 regions in the global motions (Fig. 13, panel B).



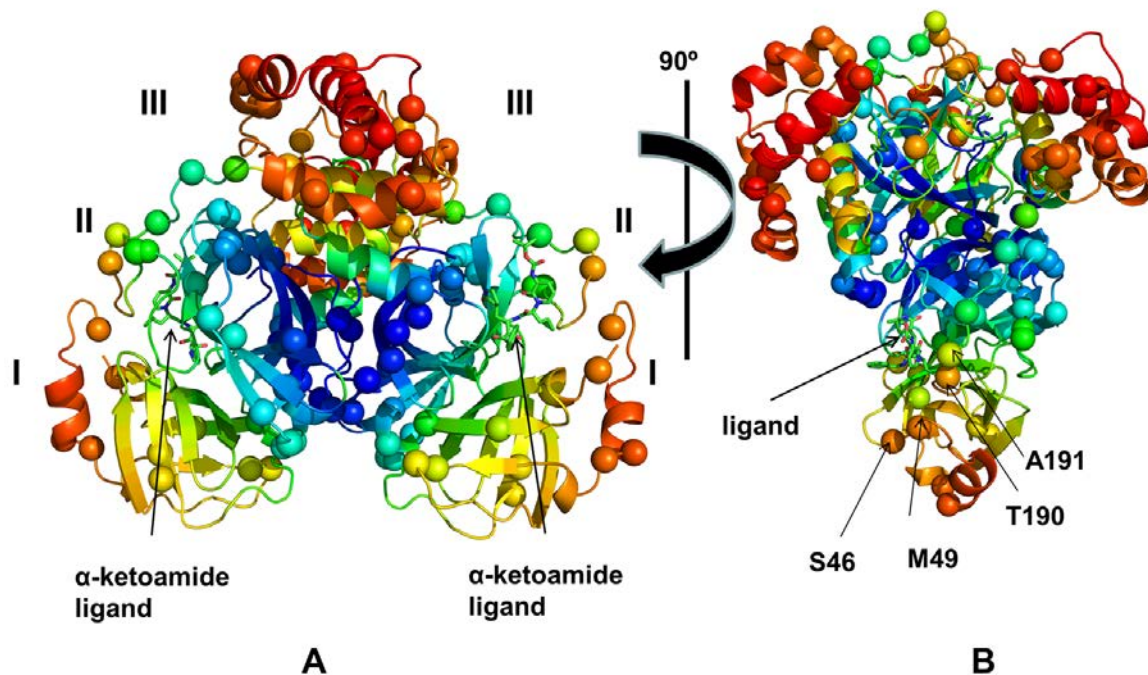

561  
562 **Fig. 13** Structural map of functional motion profiles of the SARS-CoV-2 main protease structure  
563 complex with a ligand. (A) Structural map of the functional dynamics profiles derived from CG-MD  
564 simulations in the SARS-CoV-2 main protease in the complex with  $\alpha$ -ketoamide ligand (PDB ID:  
565 6Y2F). The slow mode shapes are averaged over first five lowest frequency modes. The colour  
566 gradient from blue to red indicates the decreasing structural rigidity and increasing flexibility as  
567 averaged over the first five low frequency modes. The positions of the residues undergoing  
568 mutations (A7, G15, M17, V20, T45, D48, M49, R60, K61, A70, G71, L89, K90, P99, Y101, R105, P108,  
569 A116, A129, P132, T135, I136, N151, V157, C160, A173, P184, T190, A191, A193, T196, T198, T201,  
570 L220, L232, A234, K236, Y237, D248, A255, T259, A260, V261, A266, N274, R279 and S301L) are  
571 shown in spheres coloured according to their level of rigidity and flexibility in the low frequency  
572 modes (blue-rigid, red-flexible). The locations of the protease domains I, II, and III are indicated.  
573 The  $\alpha$ -ketoamide ligands are shown in sticks in both protomers. (D) The rotated view for the  
574 structural map of functional dynamics profiles in the SARS-CoV-2 main protease with sites of  
575 mutations in spheres. The position of the  $\alpha$ -ketoamide ligand is shown in sticks. The mobile  
576 residues in the slow modes from the substrate binding site that form interactions with the ligand  
577 (S46, M49, T190, A191) are indicated by arrows and annotations.

578  
579 Our analysis shows that structural clusters of mutations may be distinguished by their  
580 evolution propensity and global mobility in slow modes regions. The mobile residues may be  
581 predisposed to serve as substrate recognition sites, whereas residues acting as global hinges during  
582 collective dynamics are often supported by conserved residues. The observed conservation and  
583 mutational patterns may thus be determined by functional catalytic requirements, structural  
584 stability and geometrical constraints, and functional dynamics patterns. We found that some sites  
585 and corresponding mutations may be associated with dynamic hinge function. The mutability of  
586 hinge sites (Y101C, R105H, P108S, V157I/L, C160S, A173V, P184L/S) and nearby sites (T190I, A191V,  
587 A193V) may be related with their structural and dynamic signatures to reside in the exposed  
588 protein regions rather than in the more conserved protein core. We could also conclude that these  
589 sites are located near the active site and control in the bending motions needed for catalysis, so their

590 mutability may have an important functional role for enzymatic activity especially when combined  
591 with mutations in adjacent regions.

### 592 3. Materials and Methods

#### 593 3.1. Sequence and template retrieval

594 A high resolution (1.48 Å) biological unit for crystal structure of the SARS-CoV-2 main  
595 protease (PDB ID: 5RFV [62]) was retrieved from the Protein Data Bank (PDB) [63] to be used as a  
596 template for homology modelling. Its sequence was used as reference throughout this work.  
597 PyMOL (version 2.4) [64] was used to remove any non-protein molecule and to reconstitute the  
598 biological unit as chains A and B. SARS-CoV-2 genomes of any length were acquired from the  
599 GISAID website as a FASTA-formatted file [9] ©.

#### 600 3.2. Building the mutation data set

601 Low coverage sequences (entries with >5% unknown nucleotides) from GISAID were not  
602 selected. A local BLAST database was then set up for these sequences using the *makeblastdb*  
603 command available from the BLAST+ application (version 2.8.1) [65]. Protease mutants were  
604 subsequently retrieved using the reference sequence as query parameter for the *tblastn* command  
605 with default parameters, except for the maximum number of target sequences, which was set at  
606 10000. Identical sequences were then filtered out before selecting BLAST hit sequences that had a  
607 100% sequence coverage and a percentage sequence identity of < 100%. Sequences coming from  
608 non-human hosts were discarded. In order to retain as much data as possible and minimize the  
609 incorporation of sequencing errors, fold coverage was used where provided, while quality was  
610 imputed on the basis of an identical M<sup>Pro</sup> sequence being present more than once in the filtered  
611 dataset, unless a sequencing fold coverage value was available. This resulted in a 50 mutant  
612 sequences with either high coverage, where available or with additional sources of support  
613 otherwise. Further details about the sequences are given in Supplementary acknowledgement Table  
614 S1.

#### 615 3.3. Homology modelling, pH adjustment and analysis of residue interactions

616 PIR-formatted target-template sequence alignment files were generated for each mutant using  
617 the BioPython library (Version 1.76) [66] within ad hoc Python scripts for use in MODELLER  
618 (version 9.22) [67]. The automodel class was used with slow refinement and a deviation of 2 Å to  
619 generate 12 models in parallel for each mutant, after which the ones with the lowest z-DOPE scores  
620 were retained. The protein was then adjusted to a pH of 7 using the PROPKA algorithm from the  
621 PDB2PQR tool (version 2.1.1) [68]. For visualising the overall interactions at given residue positions,  
622 the Arpeggio tool [69] was used to programmatically generate the inter-residue interactions, before  
623 computing their sums using an in-house Python script. More generally, the Discovery Studio  
624 Visualizer (version 19.1) was used for describing the non-bonded interactions [70].

#### 625 3.4. Molecular dynamics simulations

626 All-atom protein MD simulations were run for the protonated dimers using GROMACS  
627 (version 2016.1) [71] at the Center for High Performance Computing (CHPC). Proteins were placed  
628 in a triclinic box containing 0.15M NaCl in SPC modelled water. A minimum image distance of 1.5  
629 nm between the solute and the box was used. The system was then energy minimized using the  
630 steepest descent algorithm with an initial step size of 0.01 nm for a maximum force of 1000  
631 kJ/mol/nm and a maximum of 50000 steps. Temperature was subsequently equilibrated at 310 K for  
632 50 ps, according to the NVT ensemble. Pressure was then equilibrated at 1 bar for 50 ps, using the  
633 Berendsen algorithm according to the NPT ensemble. During both NVT and NPT, the protein was  
634 position restrained and constraints were applied on all bonds. 100 ns unrestrained production runs  
635 were then performed, with constraints were applied only on H-bonds and the Parrinello-Rahman

636 algorithm was used for pressure coupling. In all cases a time step of 2 fs was used, with a short-  
637 range non-bonded cut-off distance of 1.1 nm and the PME algorithm for long-range electrostatic  
638 interaction calculations. Prior to analysis, the periodic boundary conditions were removed and the  
639 trajectories were corrected for rotational and translational motions.

### 640 3.5. Coarse-Grained Simulations

641 Coarse-grained (CG) models enable simulations of long timescales for protein systems and  
642 assemblies, and represent a computationally effective strategy for adequate sampling of the  
643 conformational space while maintaining physical rigour. The CABS model was employed for  
644 multiple CG simulations [46–50] of the SARS-CoV-2 main protease dimer structures (PDB ID: 5RFV,  
645 6Y2E, and 6Y2F [29]). In this model, the CG representation of protein residues is reduced to four  
646 united atoms. The residues are represented by main-chain  $\alpha$ -carbons ( $C_\alpha$ ),  $\beta$ -carbons ( $C_\beta$ ), the COM  
647 of side chains and another pseudoatom placed in the centre of the  $C_\alpha$ - $C_\alpha$  pseudo-bond. The  
648 sampling scheme involved Monte Carlo (MC) dynamics moves including local moves of individual  
649 residues and moves of small fragments composed of 3 protein residues. 100 independent CG  
650 simulations were carried out for each studied system with the CABS-flex standalone Python  
651 package for fast simulations of protein dynamics, which is implemented as a Python 2.7 object-  
652 oriented package [50]. In each simulation, the total number of cycles was set to 1,000 and the  
653 number of cycles between trajectory frames was 100. Accordingly, the total number of generated  
654 models was 2,000,000 and the total number of saved models in the trajectory used for analysis was  
655 20,000. It was previously shown that the CABS-flex approach can accurately recapitulate all-atom  
656 MD simulations on a long timescale [46–50]. The results of 100 independent CG-CABS simulations  
657 for each system were averaged to obtain adequate sampling and ensure convergence of simulation  
658 runs.

### 659 3.6. Dynamic Residue Network (DRN) analysis and Dynamic Cross Correlation (DCC)

660 The MD-TASK tool kit [34] was used to calculate the averaged *betweenness centrality* (BC) over  
661 the last 50 ns of simulation for each proteins using a cut-off distance of 6.70 Å and a step size of 25,  
662 generating a total of 10,001 frames. DCC was calculated for each of the proteins using the same  
663 frames and time step, before linearising each matrix. Pairwise Pearson correlations were then  
664 performed for all linearised matrices before performing hierarchical clustering. In all cases, the  $C_\beta$   
665 and glycine  $C_\alpha$  atoms were used. The GROMACS commands *trjconv* and *make\_ndx* were used to  
666 reduce the trajectory sizes, to only keep  $C_\alpha$  and  $C_\beta$  atoms prior to computation.

### 667 3.7. Pocket detection and dynamic analysis

668 The reconstituted biological unit for the reference structure was submitted to the FTMap web  
669 server using default parameters. The PyMOL plugin PyVOL was then used to identify the surfaces  
670 of any potential cavity, specifying the protein as selection, with the default minimum volume of 200  
671 Å<sup>3</sup>. Predictions from both tools were combined. Residues for the interprotomer subpocket were  
672 defined by visually inspecting residues in close proximity to the cavity surfaces detected by PyVOL  
673 that overlapped with part of the FTMap probe binding predictions. The pocket was selected due to  
674 its location and accessibility to the outside. The substrate binding residues (identified using PyVOL)  
675 from both protomers of M<sup>Pro</sup> were also investigated due their functional importance in catalysis,  
676 even though FTMap did not identify a binding hotspot at that location. The radius of gyration ( $R_g$ )  
677 for the subpocket and the binding pockets was then computed from the entirety of the simulated  
678 MD data in each case, using the GROMACS *gyrate* command. The generated data was then  
679 visualised and analysed using various open source Python libraries, such as matplotlib [72],  
680 Seaborn, Pandas [73], NumPy [74], SciPy [75], MDTraj [76] and NGLview [77].

## 681 4. Conclusions

682 COVID-19 represents a significant global threat for which no effective solution currently exists,  
683 with the exception of social distancing, which has slowed down the viral progression. Time is of the  
684 essence to find a cure that will counter the impact of the virus, especially for those at higher risk  
685 and for the world economies. Analysing the structural and dynamic properties of the novel mutants  
686 of the SARS CoV-2 M<sup>pro</sup> gives important pointers and details about its dynamics behaviour.

687 From this work, several non-synonymous mutations were found across all domains of the  
688 SARS-CoV-2 M<sup>pro</sup>. There are various single residue substitutions, among which several are  
689 substitutions of alanine and valine. These mutations have occurred both in buried and solvent-  
690 accessible surfaces. From our filtered data set, residue positions 15, 157 and 184 appear to have  
691 mutated more than once. A relatively high number of titratable amino acids present in M<sup>pro</sup>, which  
692 we presume may play an important role in influencing its behaviour at various pH levels. Higher  
693 backbone flexibility was observed for the isolates EPI\_ISL416720, EPI\_ISL426097, EPI\_ISL421763,  
694 EPI\_ISL420610, EPI\_ISL425284, EPI\_ISL421380, EPI\_ISL423772 and EPI\_ISL425886. More  
695 importantly, a high number of samples displayed various levels of stability of the N-finger region,  
696 suggesting an active viral adaptation in the human host, trying to find a trade-off between viral  
697 fitness and immune egress. More generally, regions of lowest flexibility (and high *BC*) were core  
698 residues, while solvent-exposed loops were most flexible. All samples displayed a slight  
699 interprotomer twisting motion. A high degree of variation was observed in (1) the angle formed  
700 between domains I, II and II, (2) the substrate binding pocket R<sub>g</sub>, (3) the interprotomer pocket R<sub>g</sub>  
701 and (4) the N-finger flexibility, which may all be good descriptors for characterising M<sup>pro</sup> dynamics.  
702 *BC* values were very similar across all samples, with extreme values being essentially anti-  
703 correlated to RMSF. Residues 17 and 128 appear to be very central residues, and based on the *BC*  
704 network metric, it is likely that mutations altering their physicochemical property may have the  
705 potential to alter dimer stability. We propose the presence of a mirrored allosteric interprotomer  
706 pocket, supported by multiple cavity detection approaches, and correlations between the  
707 interprotomer pocket compaction and the substrate binding pocket. The mirrored pocket may have  
708 the potential to accommodate compounds of low molecular weight and polarity. Asymmetries to  
709 partial symmetries in R<sub>g</sub> distributions were seen for each of the substrate binding pockets and the  
710 interprotomer cavities for each isolate. However, a large portion of the samples displayed overall  
711 positive correlations according to DCC. In each individual DCC plot, domains I and II are found to  
712 behave as a single unit while domain III is generally more independent. Thorough, independent CG  
713 simulations of the apo and the ligand-bound M<sup>pro</sup> further revealed a connection between regions  
714 accumulating clusters of mutations and their degree of residue fluctuation from the slowest modes.  
715 Additionally, we report of a possible set of dynamic hinging residues and their tendency to acquire  
716 mutations in exposed protein regions, whilst being grounded by less mutable core residues.

717 As a final note, it is important to be aware that there is an inherent lack of sampling depth in  
718 this current analysis of COVID-19 sequences due to the existence of undiagnosed mutations that  
719 may be present among infected individuals [78] at the time of writing, and in our case we might  
720 have missed certain mutations using our filtering criteria, in our effort to balance accuracy and the  
721 number of high confidence representative samples. Therefore frequencies should be handled with  
722 caution especially at the early stages of the SARS-CoV-2 evolution.

## 723 **Supplementary Materials:**

724 **Fig. S1.** Heat map for the RMSF recorded from each chain of the M<sup>pro</sup> samples. The data has been clustered  
725 separately for each segment of the protease (shown along the y-axis). The dendrograms have been removed for  
726 clarity. RMSF are plotted separately to highlight domain level differences, which have their own scale.  
727 Domains I-III are annotated as red, blue and orange strips respectively. The N-finger is in cyan while the linker  
728 is coloured green. Active site residues are denoted by the letter "x". **Fig. S2.** Heat map of averaged *BC* values  
729 for each chain of the M<sup>pro</sup> samples. Each sample has been clustered using hierarchical clustering with the  
730 Euclidean distance metric. Domains I-III are annotated as red, blue and orange strips respectively. The N-finger  
731 is in cyan while the linker is coloured green. Active site residues are denoted by the letter "x". **Table S1.**  
732 Acknowledgement and sequence support. **Table S2.** High *BC* residues are shown for each chain (A and B).

733 **Author Contributions:** Conceptualization, Olivier Sheik Amamuddy and Özlem Tastan Bishop; Data curation,  
734 Olivier Sheik Amamuddy; Formal analysis, Olivier Sheik Amamuddy, Gennady M Verkhivker and Özlem  
735 Tastan Bishop; Methodology, Olivier Sheik Amamuddy and Gennady M Verkhivker; Resources, Özlem Tastan  
736 Bishop; Software, Olivier Sheik Amamuddy; Supervision, Özlem Tastan Bishop; Visualization, Olivier Sheik  
737 Amamuddy and Gennady M Verkhivker; Writing – original draft, Olivier Sheik Amamuddy; Writing – review  
738 & editing, Olivier Sheik Amamuddy, Gennady M Verkhivker and Özlem Tastan Bishop.

739 **Funding:** This research received no external funding.

740 **Acknowledgements:** We would like to thank the Centre for High Performance Computing for providing the  
741 computer time for the simulations. We also thank GISAID making available the COVID-19 genomic material,  
742 the originating and submitting laboratories (acknowledged in Supplementary Table A1). Genetic sequences are  
743 purposely not disclosed in this article due to the restrictions from GISAID, but are accessible from the  
744 database.

745 **Conflicts of Interest:**

746 The authors declare no conflict of interest.

## 747 **Abbreviations**

|            |                                                 |
|------------|-------------------------------------------------|
| BC         | <i>Betweenness centrality</i>                   |
| BLAST      | Basic Local Alignment Search Tool               |
| CG         | Coarse-grained                                  |
| CHPC       | Centre for High Performance Computing           |
| COM        | Centre of mass                                  |
| DCC        | Dynamic Cross Correlation                       |
| GISAID     | Global Initiative on Sharing All Influenza Data |
| PDB        | Protein Data Bank                               |
| PME        | Particle Mesh Ewald                             |
| MC         | Monte Carlo                                     |
| MD         | Molecular dynamics                              |
| RMSD       | Root mean squared deviation                     |
| RMSF       | Root mean squared fluctuation                   |
| COVID-19   | Coronavirus disease 2019                        |
| SARS-CoV   | Severe acute respiratory syndrome coronavirus   |
| SARS-CoV-2 | Severe acute respiratory syndrome coronavirus 2 |

## 748 **References**

749

750 1. Zhou, P.; Yang, X.-L.; Wang, X.-G.; Hu, B.; Zhang, L.; Zhang, W.; Si, H.-R.; Zhu, Y.; Li, B.; Huang, C.-L.;  
751 et al. A pneumonia outbreak associated with a new coronavirus of probable bat origin. *Nature* **2020**,  
752 *579*, 270–273, doi:10.1038/s41586-020-2012-7.

753 2. Dai, W.; Zhang, B.; Su, H.; Li, J.; Zhao, Y.; Xie, X.; Jin, Z.; Liu, F.; Li, C.; Li, Y.; et al. Structure-based  
754 design of antiviral drug candidates targeting the SARS-CoV-2 main protease. *Science (80- )*. **2020**, *4489*,  
755 eabb4489, doi:10.1126/science.abb4489.

756 3. Mahase, E. Covid-19: death rate is 0.66% and increases with age, study estimates. *BMJ* **2020**, *369*,  
757 m1327, doi:10.1136/bmj.m1327.

- 758 4. Varga, Z.; Flammer, A.J.; Steiger, P.; Haberecker, M.; Andermatt, R.; Zinkernagel, A.S.; Mehra, M.R.;  
759 Schuepbach, R.A.; Ruschitzka, F.; Moch, H. Endothelial cell infection and endotheliitis in COVID-19.  
760 *Lancet* **2020**, *395*, 1417–1418, doi:10.1016/S0140-6736(20)30937-5.
- 761 5. Richardson, S.; Hirsch, J.S.; Narasimhan, M.; Crawford, J.M.; McGinn, T.; Davidson, K.W.; Barnaby,  
762 D.P.; Becker, L.B.; Chelico, J.D.; Cohen, S.L.; et al. Presenting Characteristics, Comorbidities, and  
763 Outcomes Among 5700 Patients Hospitalized With COVID-19 in the New York City Area. *JAMA* **2020**,  
764 *10022*, 1–8, doi:10.1001/jama.2020.6775.
- 765 6. Helmy, Y.A.; Fawzy, M.; Elasad, A.; Sobieh, A.; Kenney, S.P.; Shehata, A.A. The COVID-19 Pandemic:  
766 A Comprehensive Review of Taxonomy, Genetics, Epidemiology, Diagnosis, Treatment, and Control. *J.*  
767 *Clin. Med.* **2020**, *Vol. 9*, Page 1225 **2020**, *9*, 1225, doi:10.3390/JCM9041225.
- 768 7. Rothan, H.A.; Byrareddy, S.N. The epidemiology and pathogenesis of coronavirus disease (COVID-19)  
769 outbreak. *J. Autoimmun.* **2020**, *109*, 102433, doi:10.1016/j.jaut.2020.102433.
- 770 8. Van Lancker, W.; Parolin, Z. COVID-19, school closures, and child poverty: a social crisis in the  
771 making. *Lancet Public Heal.* **2020**, *5*, e243–e244, doi:10.1016/S2468-2667(20)30084-0.
- 772 9. Elbe, S.; Buckland-Merrett, G. Data, disease and diplomacy: GISAID’s innovative contribution to global  
773 health. *Glob. Challenges* **2017**, *1*, 33–46, doi:10.1002/gch2.1018.
- 774 10. Hatcher, E.L.; Zhdanov, S.A.; Bao, Y.; Blinkova, O.; Nawrocki, E.P.; Ostapchuck, Y.; Schäffer, A.A.;  
775 Brister, J.R. Virus Variation Resource – improved response to emergent viral outbreaks. *Nucleic Acids*  
776 *Res.* **2017**, *45*, D482–D490, doi:10.1093/nar/gkw1065.
- 777 11. Duffy, S. Why are RNA virus mutation rates so damn high? *PLOS Biol.* **2018**, *16*, e3000003,  
778 doi:10.1371/journal.pbio.3000003.
- 779 12. Abecasis, A.B.; Wensing, A.M.J.; Paraskevis, D.; Vercauteren, J.; Theys, K.; Van de Vijver, D. a M.C.;  
780 Albert, J.; Asjö, B.; Balotta, C.; Beshkov, D.; et al. HIV-1 subtype distribution and its demographic  
781 determinants in newly diagnosed patients in Europe suggest highly compartmentalized epidemics.  
782 *Retrovirology* **2013**, *10*, 7, doi:10.1186/1742-4690-10-7.
- 783 13. Kosakovsky Pond, S.L.; Smith, D.M. Are All Subtypes Created Equal? The Effectiveness of  
784 Antiretroviral Therapy against Non-Subtype B HIV-1. *Clin. Infect. Dis.* **2009**, *48*, 1306–1309,  
785 doi:10.1086/598503.
- 786 14. Hadfield, J.; Megill, C.; Bell, S.M.; Huddleston, J.; Potter, B.; Callender, C.; Sagulenko, P.; Bedford, T.;  
787 Neher, R.A. Nextstrain: real-time tracking of pathogen evolution. *Bioinformatics* **2018**, *34*, 4121–4123,  
788 doi:10.1093/bioinformatics/bty407.

- 789 15. Mousavizadeh, L.; Ghasemi, S. Genotype and phenotype of COVID-19: Their roles in pathogenesis. *J.*  
790 *Microbiol. Immunol. Infect.* **2020**, doi:10.1016/j.jmii.2020.03.022.
- 791 16. Liang, Y.; Wang, M.; Chien, C.; Yarmishyn, A.A.; Yang, Y.-P.; Lai, W.-Y.; Luo, Y.-H.; Lin, Y.-T.; Chen, Y.-  
792 J.; Chang, P.-C.; et al. Highlight of Immune Pathogenic Response and Hematopathologic Effect in  
793 SARS-CoV, MERS-CoV, and SARS-Cov-2 Infection. *Front. Immunol.* **2020**, *11*, 1–11,  
794 doi:10.3389/fimmu.2020.01022.
- 795 17. Gysi, D.M.; Valle, Í. Do; Zitnik, M.; Ameli, A.; Gan, X.; Varol, O.; Sanchez, H.; Baron, R.M.; Ghiassian,  
796 D.; Loscalzo, J.; et al. Network Medicine Framework for Identifying Drug Repurposing Opportunities  
797 for COVID-19. **2020**.
- 798 18. Zhou, Y.; Hou, Y.; Shen, J.; Huang, Y.; Martin, W.; Cheng, F. Network-based drug repurposing for novel  
799 coronavirus 2019-nCoV/SARS-CoV-2. *Cell Discov.* **2020**, *6*, 14, doi:10.1038/s41421-020-0153-3.
- 800 19. Cava, C.; Bertoli, G.; Castiglioni, I. In silico discovery of candidate drugs against covid-19. *Viruses* **2020**,  
801 *12*, 1–14, doi:10.3390/v12040404.
- 802 20. Joshi, R.S.; Jagdale, S.S.; Bansode, S.B.; Shankar, S.S.; Tellis, M.B.; Pandya, V.K.; Chugh, A.; Giri, A.P.;  
803 Kulkarni, M.J. Discovery of Potential Multi-Target-Directed Ligands by Targeting Host-specific SARS-  
804 CoV-2 Structurally Conserved Main Protease \$ . *J. Biomol. Struct. Dyn.* **2020**, *0*, 1–16,  
805 doi:10.1080/07391102.2020.1760137.
- 806 21. Das, S.; Sarmah, S.; Lyndem, S.; Singha Roy, A. An investigation into the identification of potential  
807 inhibitors of SARS-CoV-2 main protease using molecular docking study. *J. Biomol. Struct. Dyn.* **2020**, 1–  
808 18, doi:10.1080/07391102.2020.1763201.
- 809 22. Jin, Z.; Du, X.; Xu, Y.; Deng, Y.; Liu, M.; Zhao, Y.; Zhang, B.; Li, X.; Zhang, L.; Peng, C.; et al. Structure of  
810 Mpro from COVID-19 virus and discovery of its inhibitors. *Nature* **2020**, doi:10.1038/s41586-020-2223-y.
- 811 23. Shah, B.; Modi, P.; Sagar, S.R. In silico studies on therapeutic agents for COVID-19: Drug repurposing  
812 approach. *Life Sci.* **2020**, *252*, 117652, doi:10.1016/j.lfs.2020.117652.
- 813 24. Randhawa, G.S.; Soltysiak, M.P.M.; El Roz, H.; de Souza, C.P.E.; Hill, K.A.; Kari, L. Machine learning  
814 using intrinsic genomic signatures for rapid classification of novel pathogens: COVID-19 case study.  
815 *PLoS One* **2020**, *15*, 1–24, doi:10.1371/journal.pone.0232391.
- 816 25. Anand, K. Coronavirus Main Proteinase (3CLpro) Structure: Basis for Design of Anti-SARS Drugs.  
817 *Science (80-. )*. **2003**, *300*, 1763–1767, doi:10.1126/science.1085658.
- 818 26. Chen, Y.W.; Yiu, C.-P.B.; Wong, K.-Y. Prediction of the SARS-CoV-2 (2019-nCoV) 3C-like protease  
819 (3CLpro) structure: virtual screening reveals velpatasvir, ledipasvir, and other drug repurposing  
820 candidates. *F1000Research* **2020**, *9*, 129, doi:10.12688/f1000research.22457.1.

- 821 27. Xue, X.; Yu, H.; Yang, H.; Xue, F.; Wu, Z.; Shen, W.; Li, J.; Zhou, Z.; Ding, Y.; Zhao, Q.; et al. Structures  
822 of Two Coronavirus Main Proteases: Implications for Substrate Binding and Antiviral Drug Design. *J.*  
823 *Virol.* **2008**, *82*, 2515–2527, doi:10.1128/JVI.02114-07.
- 824 28. Yang, H.; Xie, W.; Xue, X.; Yang, K.; Ma, J.; Liang, W.; Zhao, Q.; Zhou, Z.; Pei, D.; Ziebuhr, J.; et al.  
825 Design of Wide-Spectrum Inhibitors Targeting Coronavirus Main Proteases. *PLoS Biol.* **2005**, *3*, e324,  
826 doi:10.1371/journal.pbio.0030324.
- 827 29. Zhang, L.; Lin, D.; Sun, X.; Curth, U.; Drosten, C.; Sauerhering, L.; Becker, S.; Rox, K.; Hilgenfeld, R.  
828 Crystal structure of SARS-CoV-2 main protease provides a basis for design of improved  $\alpha$ -ketoamide  
829 inhibitors. *Science (80-. )*. **2020**, *412*, eabb3405, doi:10.1126/science.abb3405.
- 830 30. Chen, S.; Hu, T.; Zhang, J.; Chen, J.; Chen, K.; Ding, J.; Jiang, H.; Shen, X. Mutation of Gly-11 on the  
831 Dimer Interface Results in the Complete Crystallographic Dimer Dissociation of Severe Acute  
832 Respiratory Syndrome Coronavirus 3C-like Protease. *J. Biol. Chem.* **2008**, *283*, 554–564,  
833 doi:10.1074/jbc.M705240200.
- 834 31. Anand, K.; Palm, G.J.; Mesters, J.R.; Siddell, S.G.; Ziebuhr, J.; Hilgenfeld, R. Structure of coronavirus  
835 main proteinase reveals combination of a chymotrypsin fold with an extra  $\alpha$ -helical domain. *EMBO J.*  
836 **2002**, *21*, 3213–3224, doi:10.1093/emboj/cdf327.
- 837 32. Shi, J.; Wei, Z.; Song, J. Dissection Study on the Severe Acute Respiratory Syndrome 3C-like Protease  
838 Reveals the Critical Role of the Extra Domain in Dimerization of the Enzyme. *J. Biol. Chem.* **2004**, *279*,  
839 24765–24773, doi:10.1074/jbc.M311744200.
- 840 33. Tahir ul Qamar, M.; Alqahtani, S.M.; Alamri, M.A.; Chen, L.-L. Structural basis of SARS-CoV-2 3CLpro  
841 and anti-COVID-19 drug discovery from medicinal plants. *J. Pharm. Anal.* **2020**, 1–7,  
842 doi:10.1016/j.jpha.2020.03.009.
- 843 34. Brown, D.K.; Penkler, D.L.; Sheik Amamuddy, O.; Ross, C.; Atilgan, A.R.; Atilgan, C.; Tastan Bishop, Ö.  
844 MD-TASK: a software suite for analyzing molecular dynamics trajectories. *Bioinformatics* **2017**, *33*,  
845 2768–2771, doi:10.1093/bioinformatics/btx349.
- 846 35. Rasschaert, D.; Duarte, M.; Laude, H. Porcine respiratory coronavirus differs from transmissible  
847 gastroenteritis virus by a few genomic deletions. *J. Gen. Virol.* **1990**, *71*, 2599–2607, doi:10.1099/0022-  
848 1317-71-11-2599.
- 849 36. Carter, R.W.; Sanford, J.C. A new look at an old virus: patterns of mutation accumulation in the human  
850 H1N1 influenza virus since 1918. *Theor. Biol. Med. Model.* **2012**, *9*, 42, doi:10.1186/1742-4682-9-42.
- 851 37. He, J.F.; Peng, G.W.; Min, J.; Yu, D.W.; Liang, W.J.; Zhang, S.Y.; Xu, R.H.; Zheng, H.Y.; Wu, X.W.; Xu, J.;  
852 et al. Molecular Evolution of the SARS Coronavirus, during the Course of the SARS Epidemic in  
853 China. *Science (80-. )*. **2004**, *303*, 1666–1669, doi:10.1126/science.1092002.



- 854 38. Vignuzzi, M.; Stone, J.K.; Andino, R. Ribavirin and lethal mutagenesis of poliovirus: molecular  
855 mechanisms, resistance and biological implications. *Virus Res.* **2005**, *107*, 173–181,  
856 doi:10.1016/j.virusres.2004.11.007.
- 857 39. Pfeiffer, J.K.; Kirkegaard, K. Increased Fidelity Reduces Poliovirus Fitness and Virulence under  
858 Selective Pressure in Mice. *PLoS Pathog.* **2005**, *1*, e11, doi:10.1371/journal.ppat.0010011.
- 859 40. Wensing, A.; Calvez, V.; Gunthard, H.; Johnson, V.; Paredes, R.; Pillay, D.; Shafer, R.; Richman, D. 2017  
860 Update of the Drug Resistance Mutations in HIV-1. *Top. Antivir. Med.* **2017**, *24*, 132–133.
- 861 41. Wensing, Annemarie M.; Calvez, Vincent; Ceccherini-Silberstein, Francesca; Charpentier, Charlotte;  
862 Gunthard, H.F.; Paredes, R.; Shafer, R. W.; Richman, D.D. 2019-Drug-Resistance-Mutations-Figures.  
863 *Top. Antivir. Med.* **2019**, *27*.
- 864 42. Jubb, H.C.; Pandurangan, A.P.; Turner, M.A.; Ochoa-Montaña, B.; Blundell, T.L.; Ascher, D.B.  
865 Mutations at protein-protein interfaces: Small changes over big surfaces have large impacts on human  
866 health. *Prog. Biophys. Mol. Biol.* **2017**, *128*, 3–13, doi:10.1016/j.pbiomolbio.2016.10.002.
- 867 43. Brown, D.K.; Sheik Amamuddy, O.; Tastan Bishop, Ö. Structure-Based Analysis of Single Nucleotide  
868 Variants in the Renin-Angiotensinogen Complex. *Glob. Heart* **2017**, *12*, 121–132,  
869 doi:10.1016/j.gheart.2017.01.006.
- 870 44. Bakan, A.; Meireles, L.M.; Bahar, I. ProDy: Protein Dynamics Inferred from Theory and Experiments.  
871 *Bioinformatics* **2011**, *27*, 1575–1577, doi:10.1093/bioinformatics/btr168.
- 872 45. Humphrey, W.; Dalke, A.; Schulten, K. VMD: Visual molecular dynamics. *J. Mol. Graph.* **1996**, *14*, 33–38,  
873 doi:10.1016/0263-7855(96)00018-5.
- 874 46. Kolinski, A. Protein modeling and structure prediction with a reduced representation. *Acta Biochim.*  
875 *Pol.* **2004**, *51*, 349–371, doi:10.18388/abp.2004\_3575.
- 876 47. Kmiecik, S.; Gront, D.; Kolinski, M.; Wieteska, L.; Dawid, A.E.; Kolinski, A. Coarse-Grained Protein  
877 Models and Their Applications. *Chem. Rev.* **2016**, *116*, 7898–7936, doi:10.1021/acs.chemrev.6b00163.
- 878 48. Kmiecik, S.; Kouza, M.; Badaczewska-Dawid, A.; Kloczkowski, A.; Kolinski, A. Modeling of Protein  
879 Structural Flexibility and Large-Scale Dynamics: Coarse-Grained Simulations and Elastic Network  
880 Models. *Int. J. Mol. Sci.* **2018**, *19*, 3496, doi:10.3390/ijms19113496.
- 881 49. Ciemny, M.; Badaczewska-Dawid, A.; Pikuzinska, M.; Kolinski, A.; Kmiecik, S. Modeling of Disordered  
882 Protein Structures Using Monte Carlo Simulations and Knowledge-Based Statistical Force Fields. *Int. J.*  
883 *Mol. Sci.* **2019**, *20*, 606, doi:10.3390/ijms20030606.

- 884 50. Kurcinski, M.; Oleniecki, T.; Ciemny, M.P.; Kuriata, A.; Kolinski, A.; Kmiecik, S. CABS-flex standalone:  
885 a simulation environment for fast modeling of protein flexibility. *Bioinformatics* **2019**, *35*, 694–695,  
886 doi:10.1093/bioinformatics/bty685.
- 887 51. Šali, A.; Blundell, T.L. Comparative Protein Modelling by Satisfaction of Spatial Restraints. *J. Mol. Biol.*  
888 **1993**, *234*, 779–815, doi:10.1006/jmbi.1993.1626.
- 889 52. Sali, A. MODELLER: A Program for Protein Structure Modeling Release 9.12, r9480. *Rockefeller Univ.*  
890 2013.
- 891 53. Yang, H.; Yang, M.; Ding, Y.; Liu, Y.; Lou, Z.; Zhou, Z.; Sun, L.; Mo, L.; Ye, S.; Pang, H.; et al. The crystal  
892 structures of severe acute respiratory syndrome virus main protease and its complex with an inhibitor.  
893 *Proc. Natl. Acad. Sci. U. S. A.* **2003**, *100*, 13190–13195, doi:10.1073/pnas.1835675100.
- 894 54. Faraggi, E.; Dunker, A.K.; Jernigan, R.L.; Kloczkowski, A. Entropy, Fluctuations, and Disordered  
895 Proteins. *Entropy* **2019**, *21*, 764, doi:10.3390/e21080764.
- 896 55. Horowitz, S.; Trievel, R.C. Carbon-Oxygen Hydrogen Bonding in Biological Structure and Function. *J.*  
897 *Biol. Chem.* **2012**, *287*, 41576–41582, doi:10.1074/jbc.R112.418574.
- 898 56. Wang, F.; Chen, C.; Tan, W.; Yang, K.; Yang, H. Structure of Main Protease from Human Coronavirus  
899 NL63: Insights for Wide Spectrum Anti-Coronavirus Drug Design. *Sci. Rep.* **2016**, *6*, 22677,  
900 doi:10.1038/srep22677.
- 901 57. Zhao, Q.; Li, S.; Xue, F.; Zou, Y.; Chen, C.; Bartlam, M.; Rao, Z. Structure of the Main Protease from a  
902 Global Infectious Human Coronavirus, HCoV-HKU1. *J. Virol.* **2008**, *82*, 8647–8655,  
903 doi:10.1128/JVI.00298-08.
- 904 58. Penkler, D.L.; Atilgan, C.; Tastan Bishop, Ö. Allosteric Modulation of Human Hsp90 $\alpha$  Conformational  
905 Dynamics. *J. Chem. Inf. Model.* **2018**, *58*, 383–404, doi:10.1021/acs.jcim.7b00630.
- 906 59. Kozakov, D.; Grove, L.E.; Hall, D.R.; Bohnuud, T.; Mottarella, S.E.; Luo, L.; Xia, B.; Beglov, D.; Vajda, S.  
907 The FTMap family of web servers for determining and characterizing ligand-binding hot spots of  
908 proteins. *Nat. Protoc.* **2015**, *10*, 733–755, doi:10.1038/nprot.2015.043.
- 909 60. Smith, R.H.B.; Dar, A.C.; Schlessinger, A. PyVOL: a PyMOL plugin for visualization, comparison, and  
910 volume calculation of drug-binding sites. *bioRxiv* **2019**, *c*, 816702, doi:10.1101/816702.
- 911 61. Kim, S.; Chen, J.; Cheng, T.; Gindulyte, A.; He, J.; He, S.; Li, Q.; Shoemaker, B.A.; Thiessen, P.A.; Yu, B.;  
912 et al. PubChem 2019 update: improved access to chemical data. *Nucleic Acids Res.* **2019**, *47*, D1102–  
913 D1109, doi:10.1093/nar/gky1033.

- 914 62. Fearon, D.; Owen, C.D.; Douangamath, A.; Lukacik, P.; Powell, A.J.; Strain-Damerell, C.M.; Resnick, E.;  
915 Krojer, T.; Gehrtz, P.; Wild, C.; et al. PanDDA analysis group deposition -- Crystal Structure of SARS-  
916 CoV-2 main protease in complex with PCM-0102306 2020.
- 917 63. Burley, S.K.; Berman, H.M.; Bhikadiya, C.; Bi, C.; Chen, L.; Di Costanzo, L.; Christie, C.; Dalenberg, K.;  
918 Duarte, J.M.; Dutta, S.; et al. RCSB Protein Data Bank: biological macromolecular structures enabling  
919 research and education in fundamental biology, biomedicine, biotechnology and energy. *Nucleic Acids*  
920 *Res.* **2019**, *47*, D464–D474, doi:10.1093/nar/gky1004.
- 921 64. Schrödinger, L. The PyMOL Molecular Graphics System, Version 2.4.0a0 2015.
- 922 65. Camacho, C.; Coulouris, G.; Avagyan, V.; Ma, N.; Papadopoulos, J.; Bealer, K.; Madden, T.L. BLAST+:  
923 architecture and applications. *BMC Bioinformatics* **2009**, *10*, 421, doi:10.1186/1471-2105-10-421.
- 924 66. Cock, P.J.A.; Antao, T.; Chang, J.T.; Chapman, B.A.; Cox, C.J.; Dalke, A.; Friedberg, I.; Hamelryck, T.;  
925 Kauff, F.; Wilczynski, B.; et al. Biopython: freely available Python tools for computational molecular  
926 biology and bioinformatics. *Bioinformatics* **2009**, *25*, 1422–1423, doi:10.1093/bioinformatics/btp163.
- 927 67. Šali, A.; Blundell, T.L. Comparative Protein Modelling by Satisfaction of Spatial Restraints. *J. Mol. Biol.*  
928 **1993**, *234*, 779–815, doi:10.1006/jmbi.1993.1626.
- 929 68. Dolinsky, T.J.; Nielsen, J.E.; McCammon, J.A.; Baker, N.A. PDB2PQR: An automated pipeline for the  
930 setup of Poisson-Boltzmann electrostatics calculations. *Nucleic Acids Res.* **2004**, *32*,  
931 doi:10.1093/nar/gkh381.
- 932 69. Jubb, H.C.; Higuero, A.P.; Ochoa-Montaño, B.; Pitt, W.R.; Ascher, D.B.; Blundell, T.L. Arpeggio: A  
933 Web Server for Calculating and Visualising Interatomic Interactions in Protein Structures. *J. Mol. Biol.*  
934 **2017**, *429*, 365–371, doi:10.1016/j.jmb.2016.12.004.
- 935 70. Dassault Systèmes BIOVIA Discovery Studio Visualizer, v19.1.0.18287 2019.
- 936 71. Van Der Spoel, D.; Lindahl, E.; Hess, B.; Groenhof, G.; Mark, A.E.; Berendsen, H.J.C. GROMACS: Fast,  
937 flexible, and free. *J. Comput. Chem.* **2005**, *26*, 1701–1718, doi:10.1002/jcc.20291.
- 938 72. Hunter, J.D. Matplotlib: A 2D Graphics Environment. *Comput. Sci. Eng.* **2007**, *9*, 90–95,  
939 doi:10.1109/MCSE.2007.55.
- 940 73. McKinney, W. Data Structures for Statistical Computing in Python. In Proceedings of the Proceedings  
941 of the 9th Python in Science Conference; 2010; Vol. 445, pp. 51–56.
- 942 74. Van Der Walt, S.; Colbert, S.C.; Varoquaux, G. The NumPy array: A structure for efficient numerical  
943 computation. *Comput. Sci. Eng.* **2011**, *13*, 22–30, doi:10.1109/MCSE.2011.37.

- 944 75. Virtanen, P.; Gommers, R.; Oliphant, T.E.; Haberland, M.; Reddy, T.; Cournapeau, D.; Burovski, E.;  
945 Peterson, P.; Weckesser, W.; Bright, J.; et al. SciPy 1.0: fundamental algorithms for scientific computing  
946 in Python. *Nat. Methods* **2020**, *17*, 261–272, doi:10.1038/s41592-019-0686-2.
- 947 76. McGibbon, R.T.; Beauchamp, K.A.; Harrigan, M.P.; Klein, C.; Swails, J.M.; Hernández, C.X.; Schwantes,  
948 C.R.; Wang, L.-P.; Lane, T.J.; Pande, V.S. MDTraj: A Modern Open Library for the Analysis of Molecular  
949 Dynamics Trajectories. *Biophys. J.* **2015**, *109*, 1528–1532, doi:10.1016/j.bpj.2015.08.015.
- 950 77. Nguyen, H.; Case, D.A.; Rose, A.S. NGLview—interactive molecular graphics for Jupyter notebooks.  
951 *Bioinformatics* **2018**, *34*, 1241–1242, doi:10.1093/bioinformatics/btx789.
- 952 78. Chookajorn, T. Evolving COVID-19 conundrum and its impact. *Proc. Natl. Acad. Sci.* **2020**, *0*,  
953 202007076, doi:10.1073/pnas.2007076117.  
954
